# Supplementary material
Source: HighWire-hosted journal article supplement (doi:10.1101/rna.080644.125)

**Supplementary Chart S2.** Physiochemical and pharmacokinetic properties of the selected compounds, calculated using the SwissADME server at <http://www.swissadme.ch> and shown on the following 13 pages.


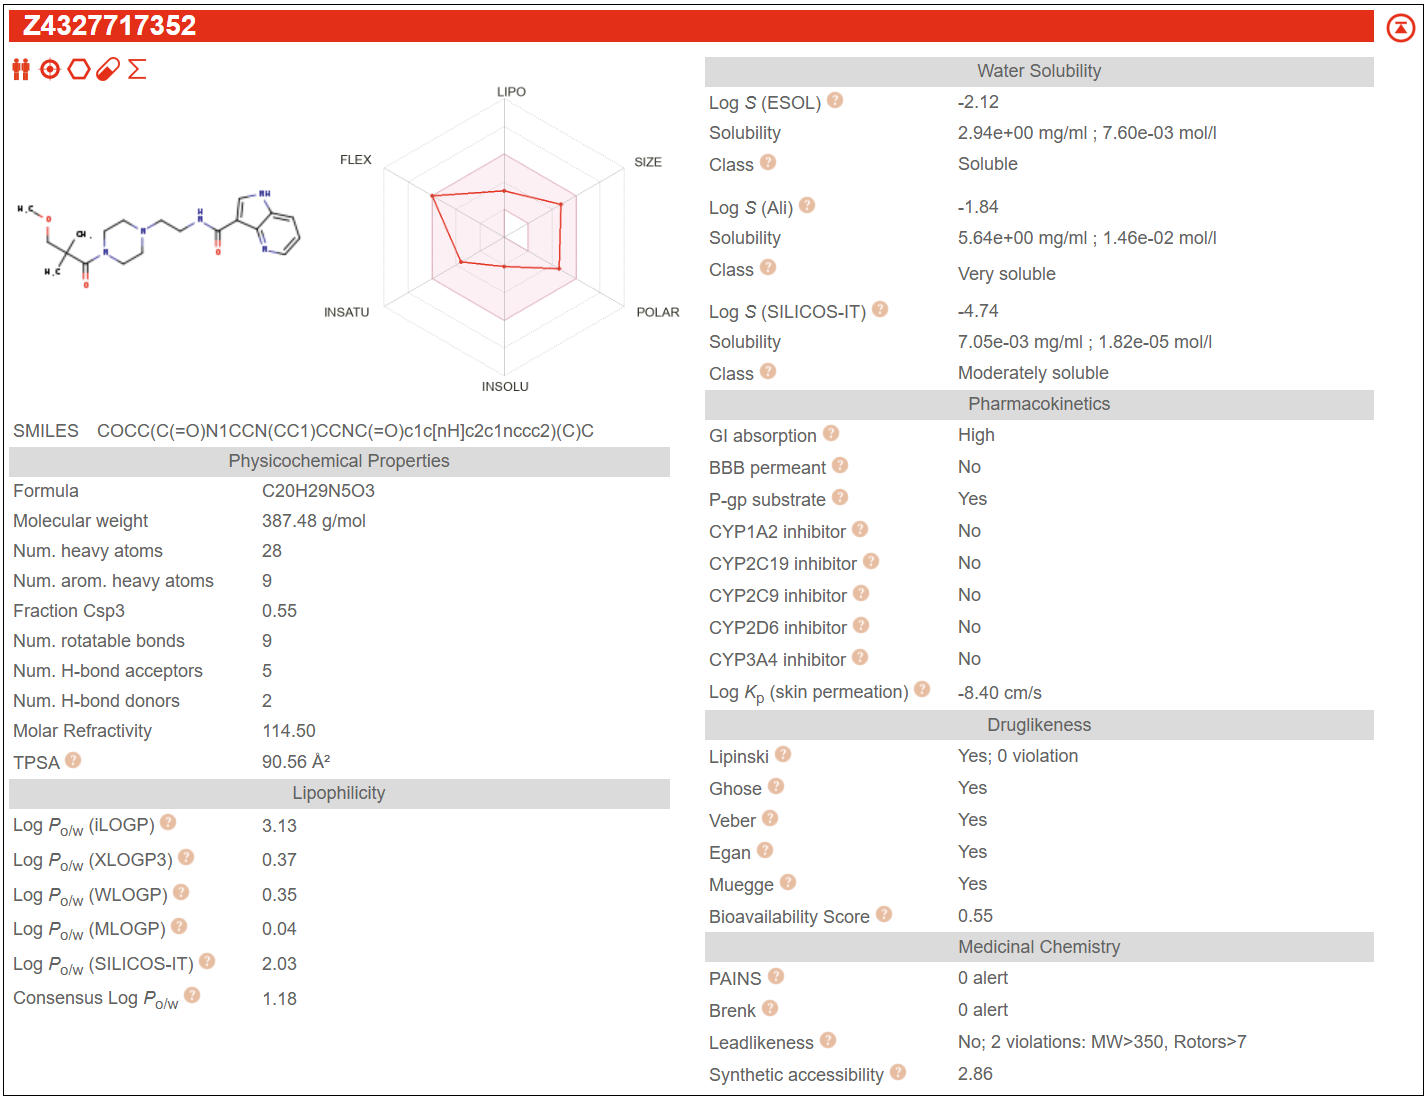

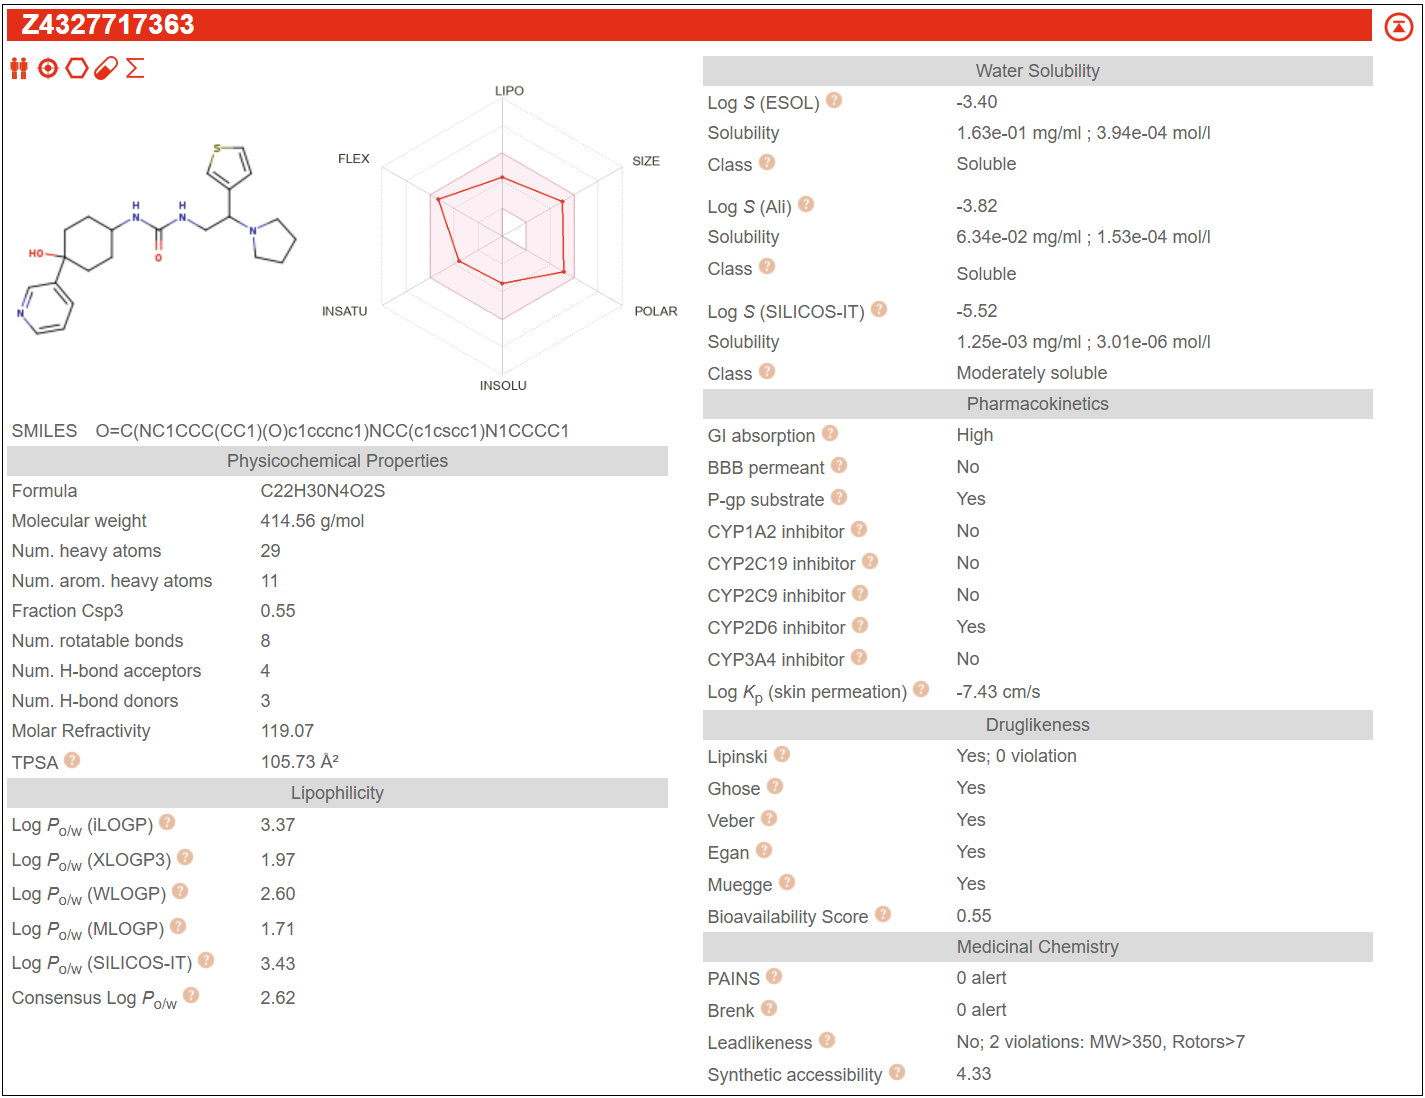


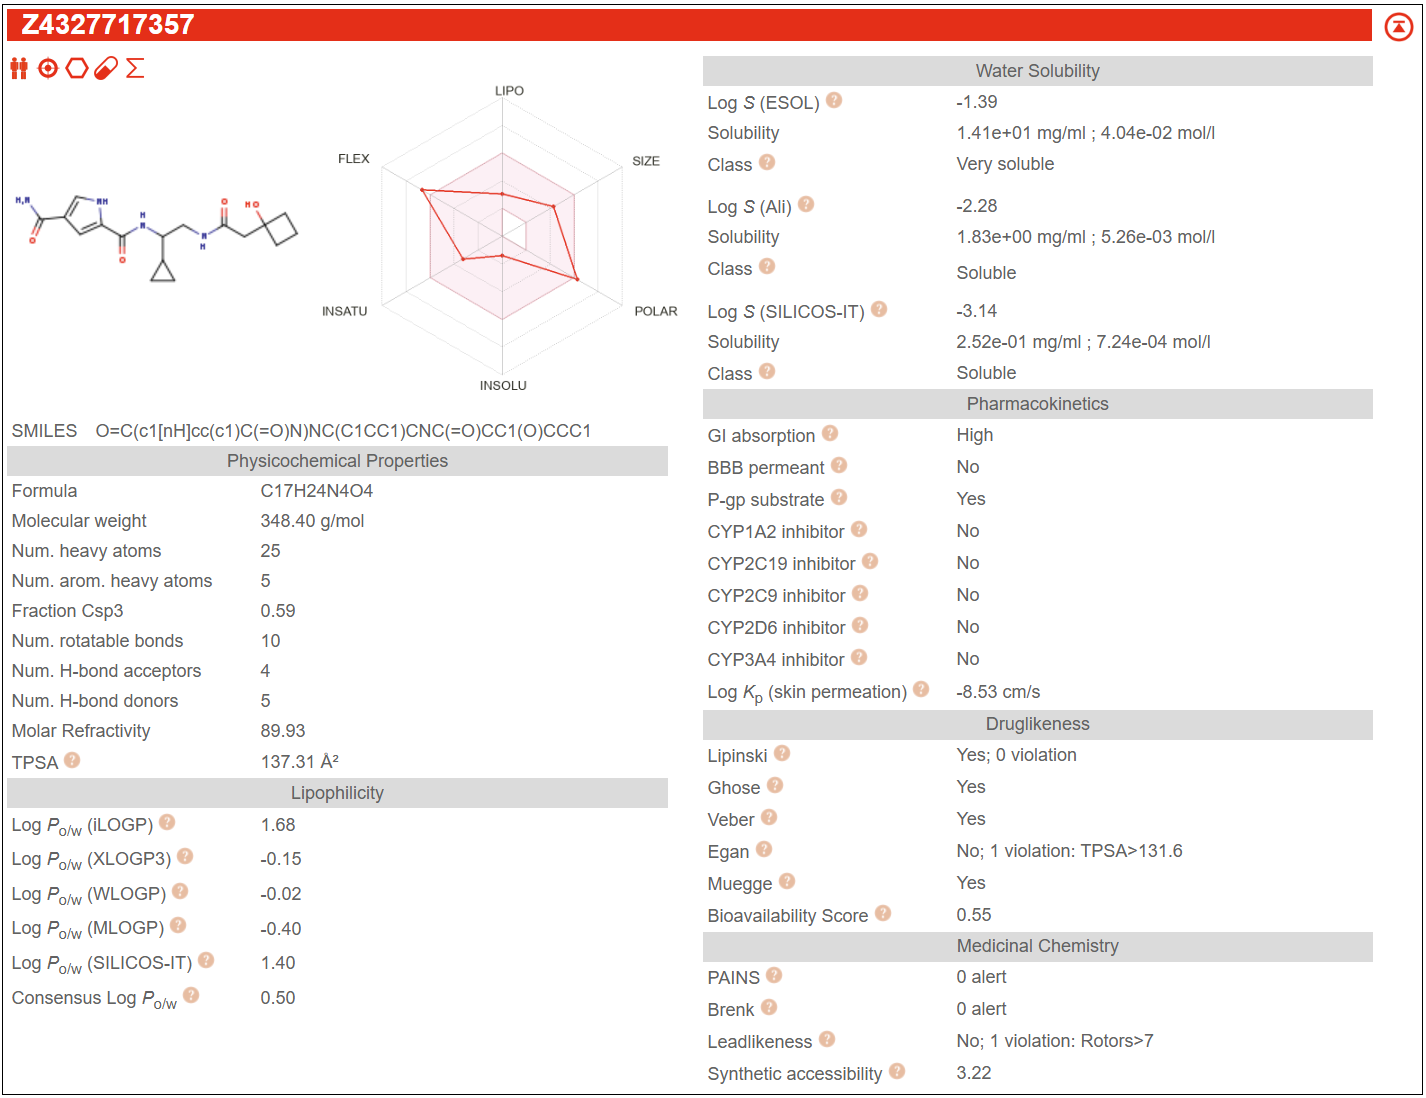

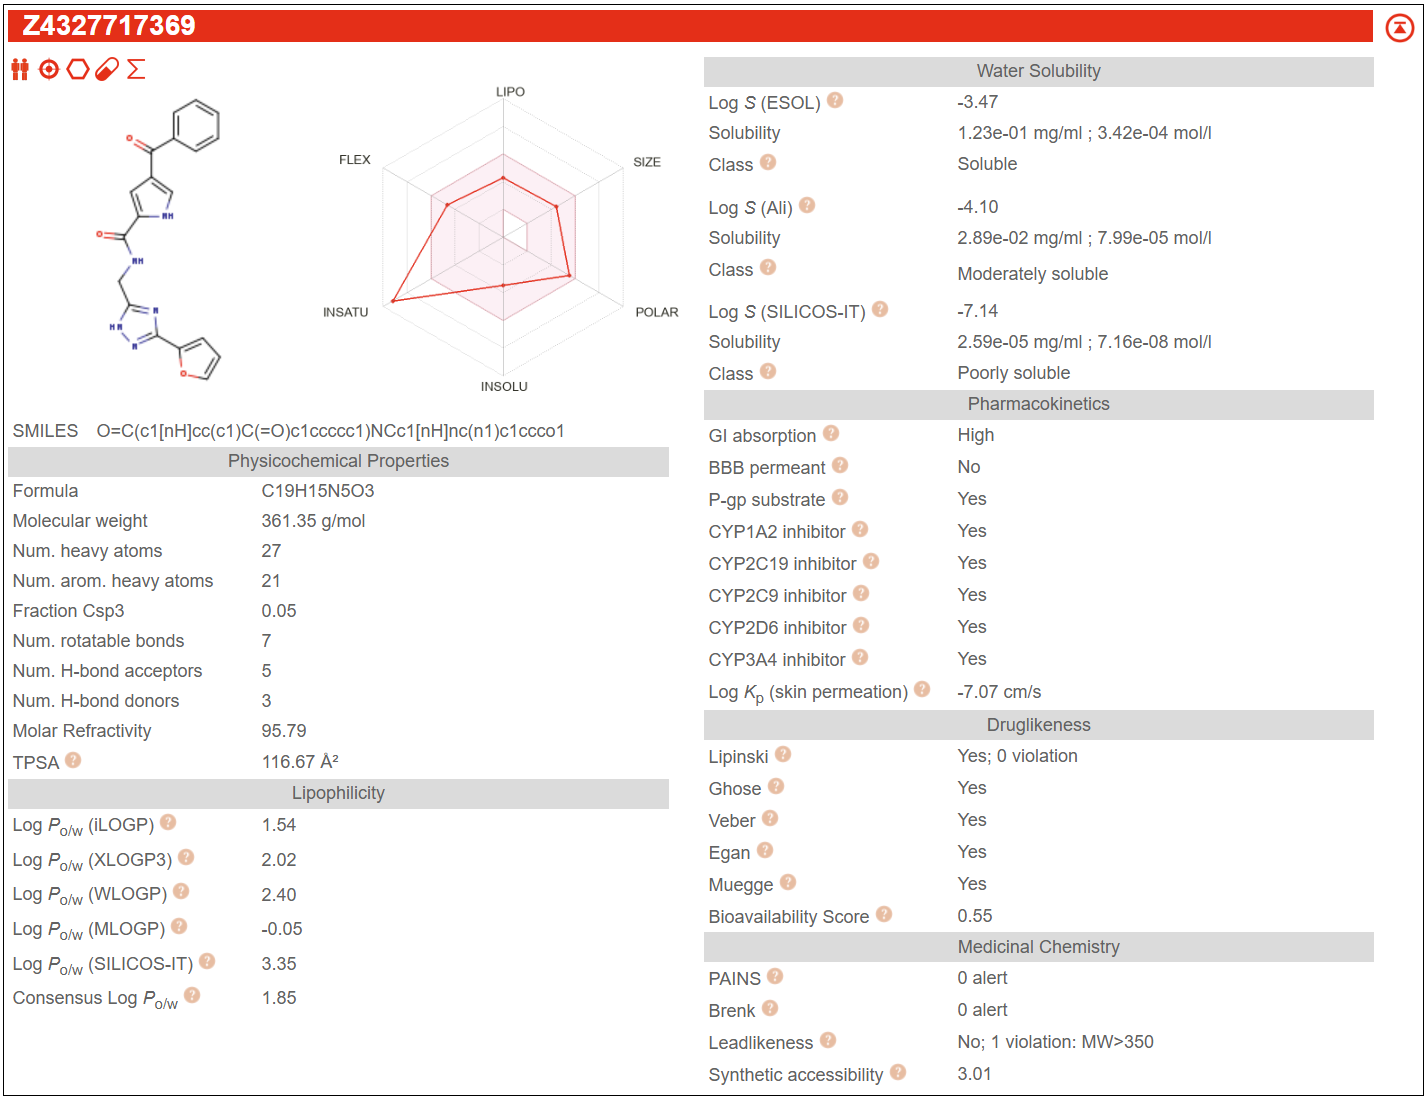


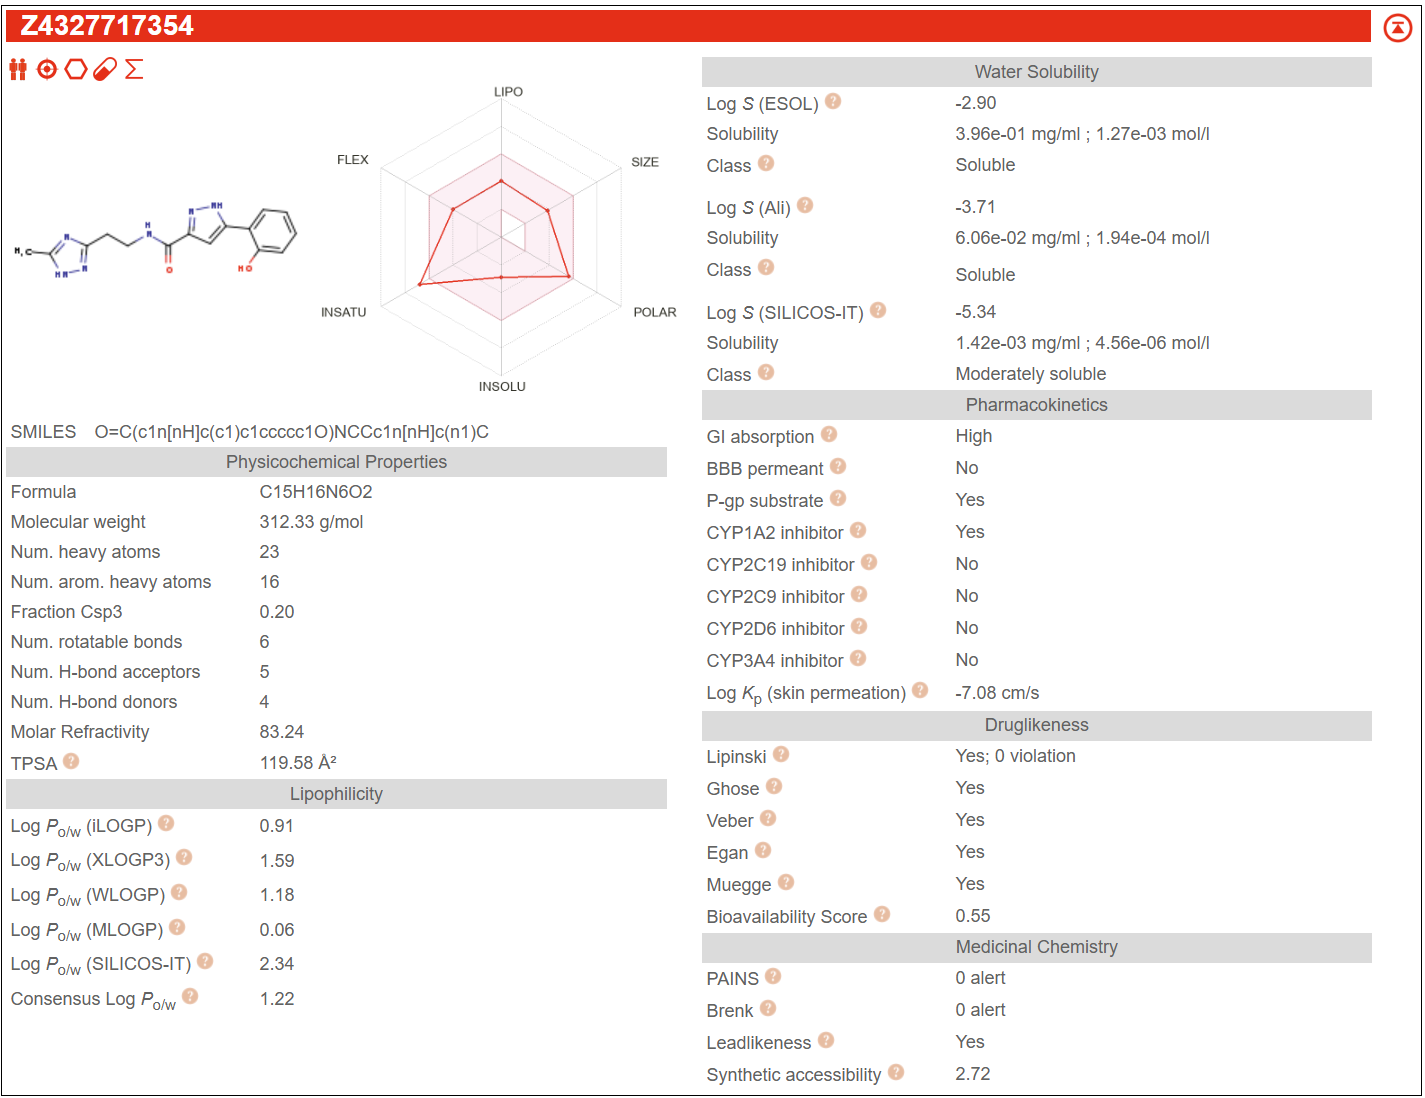

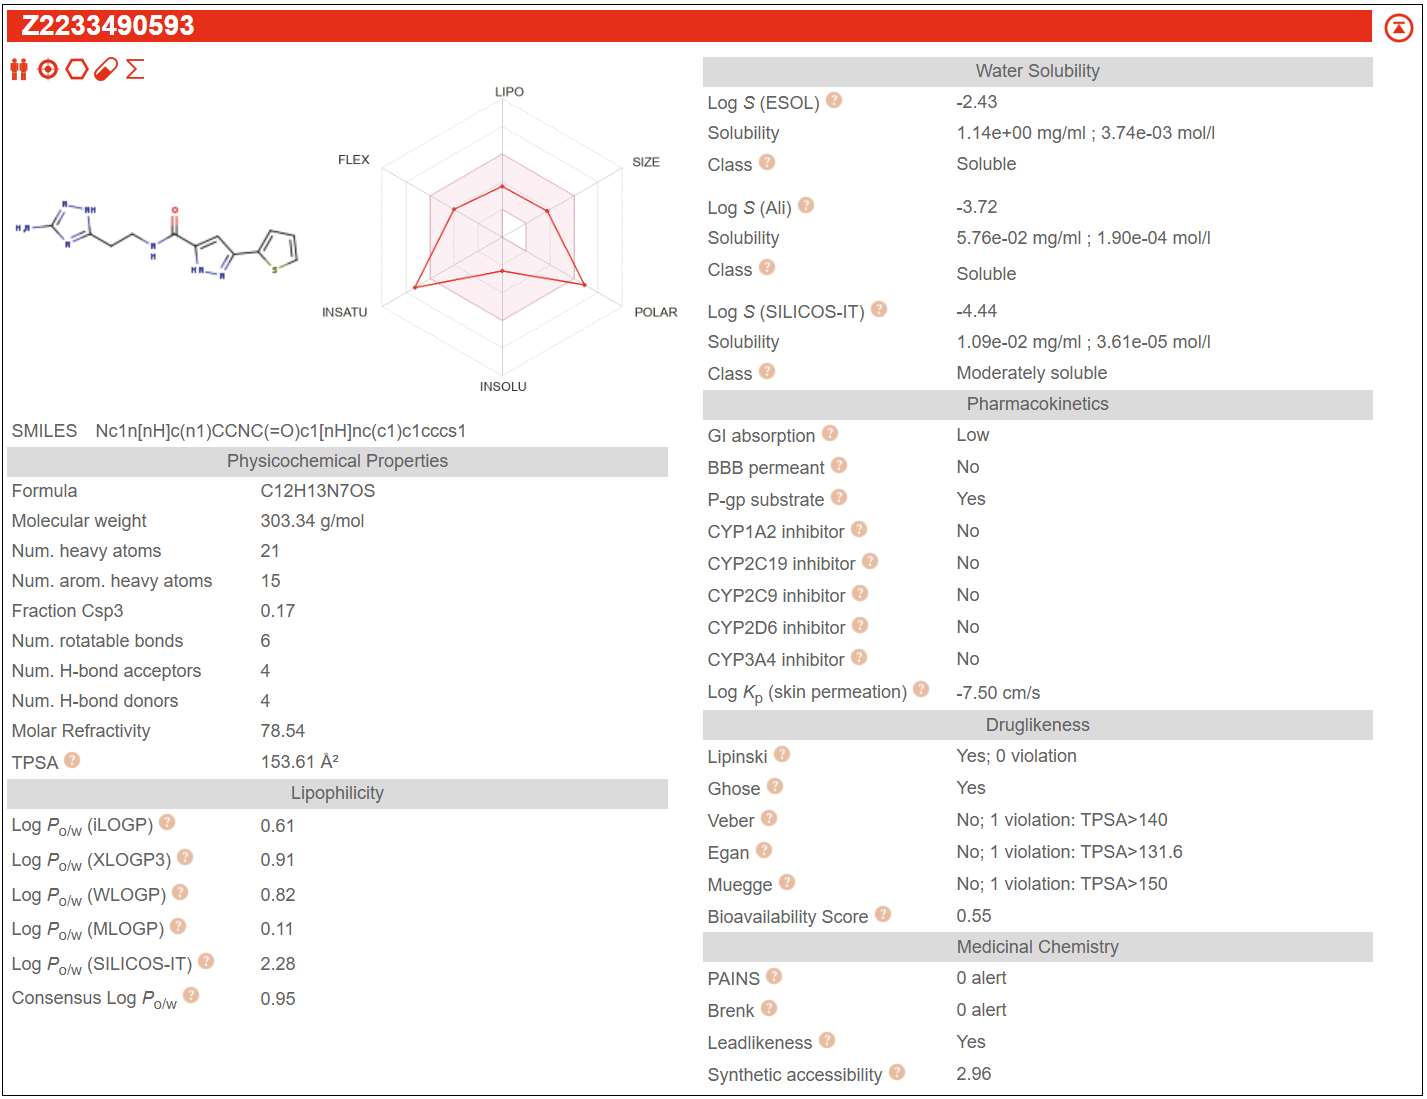


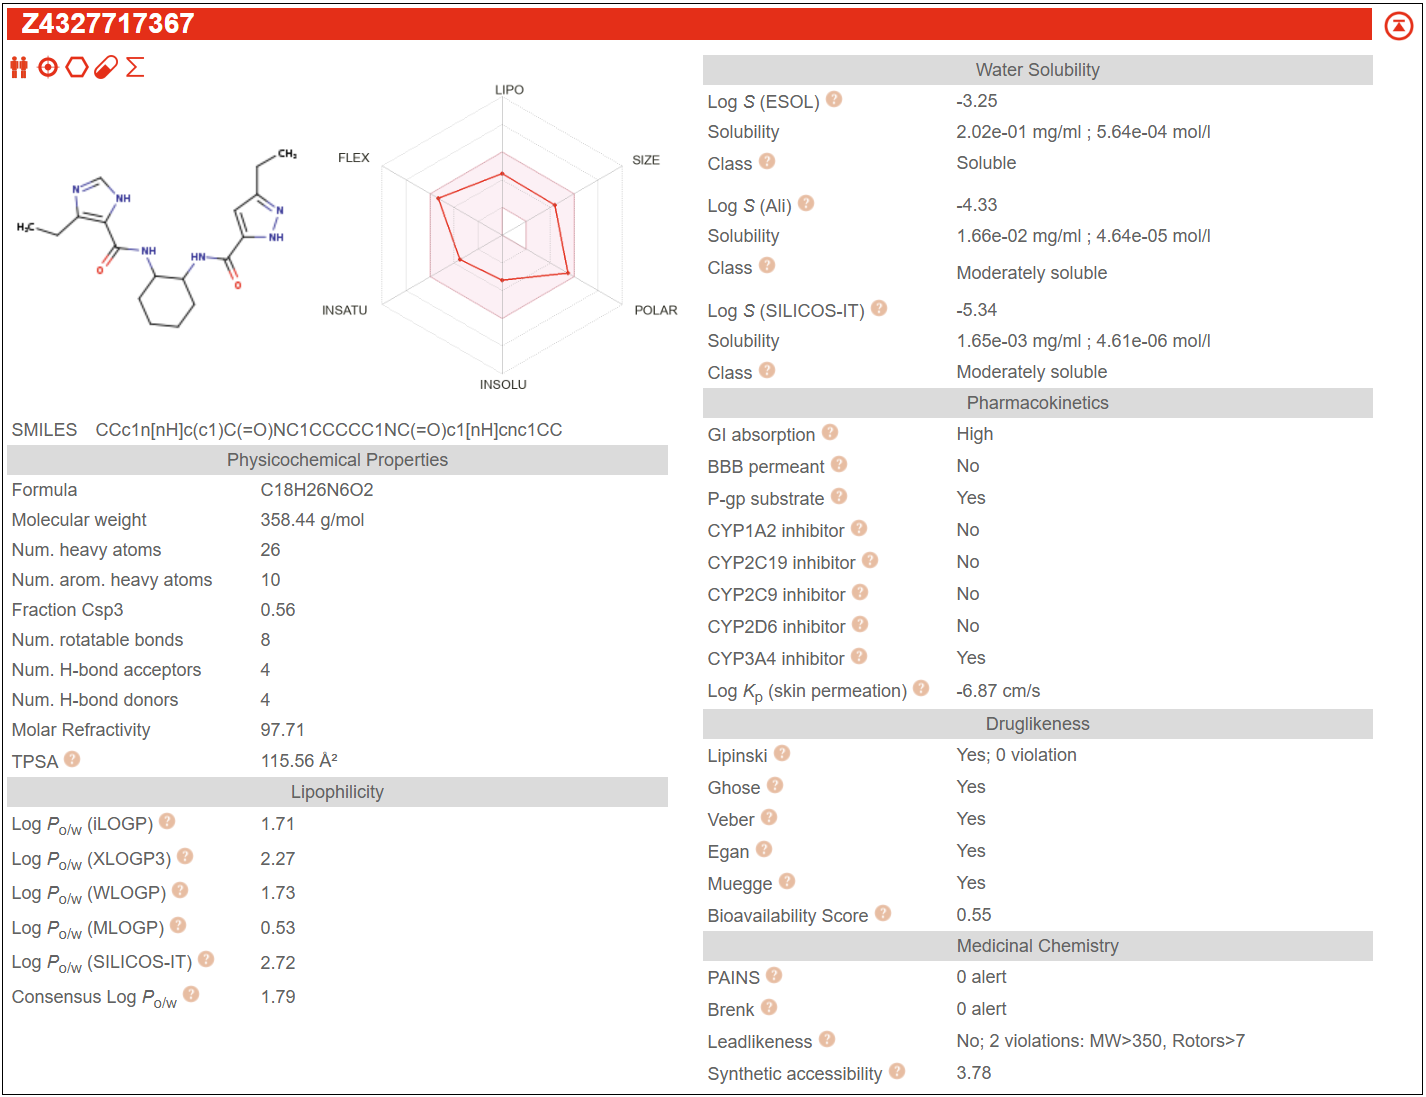

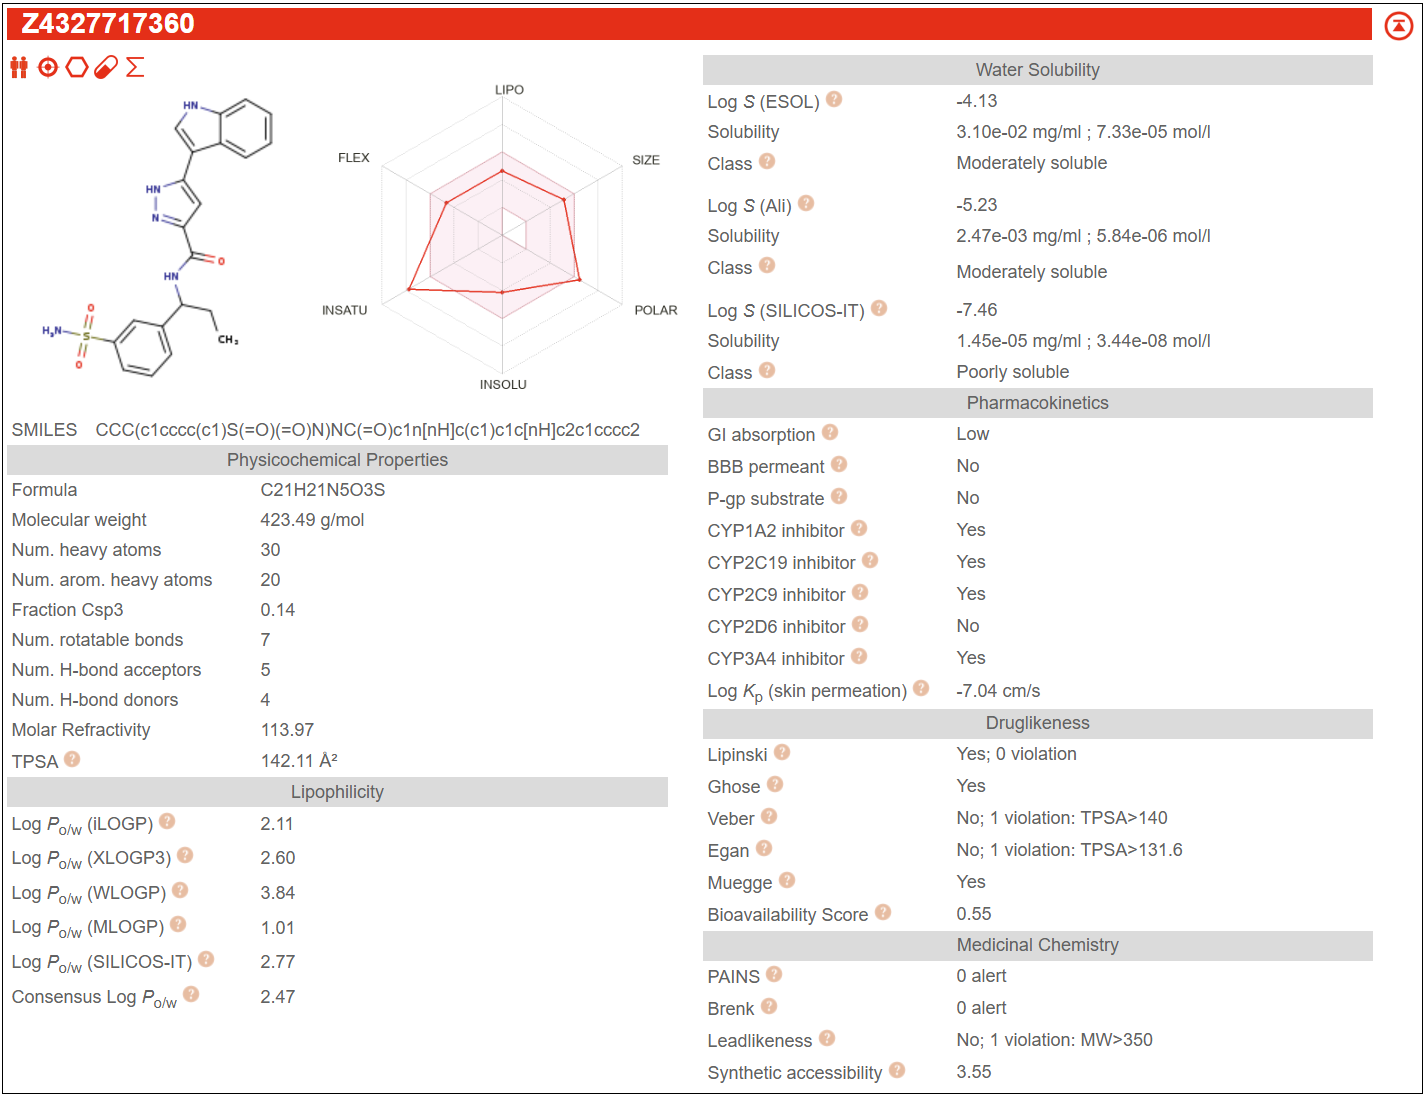


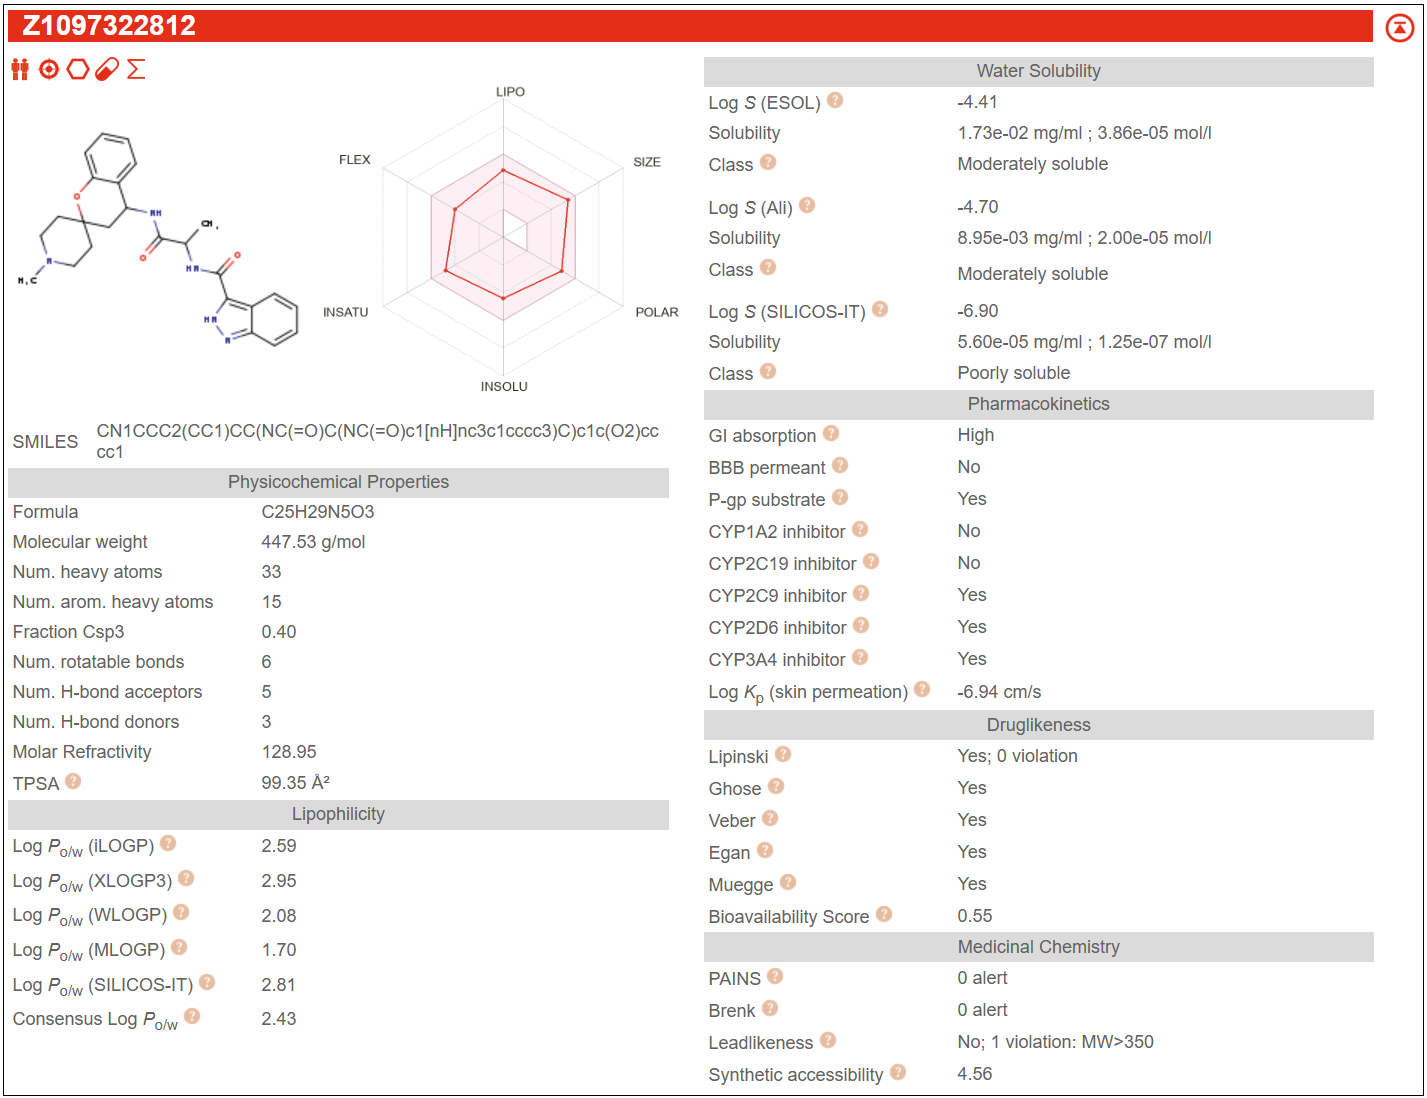

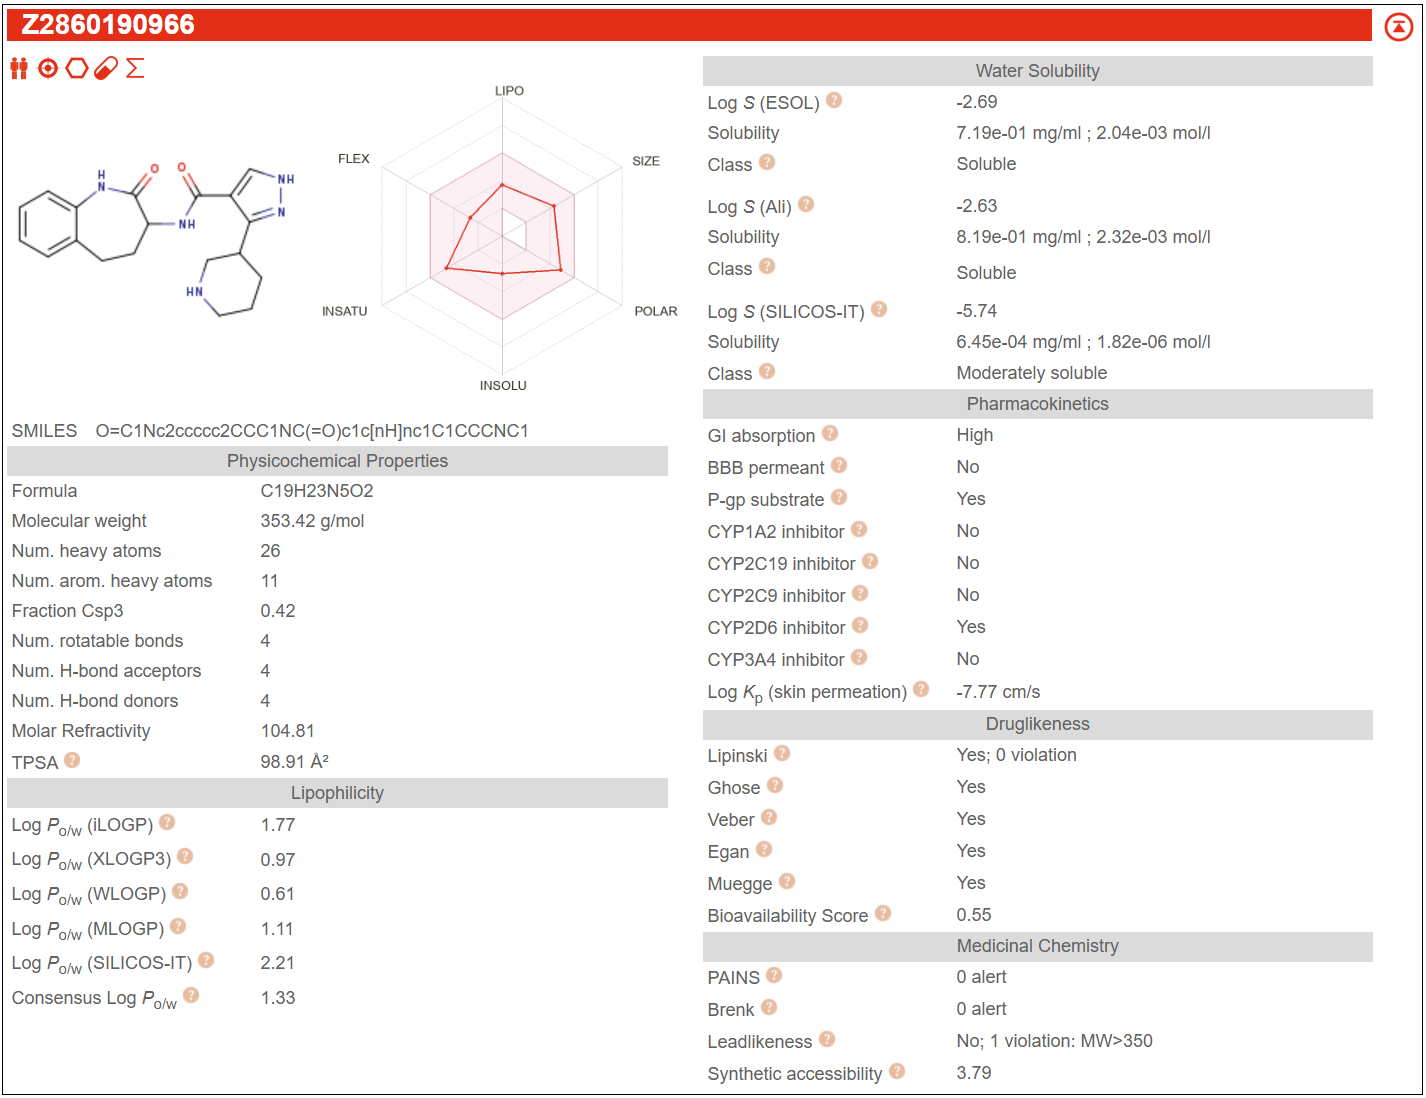


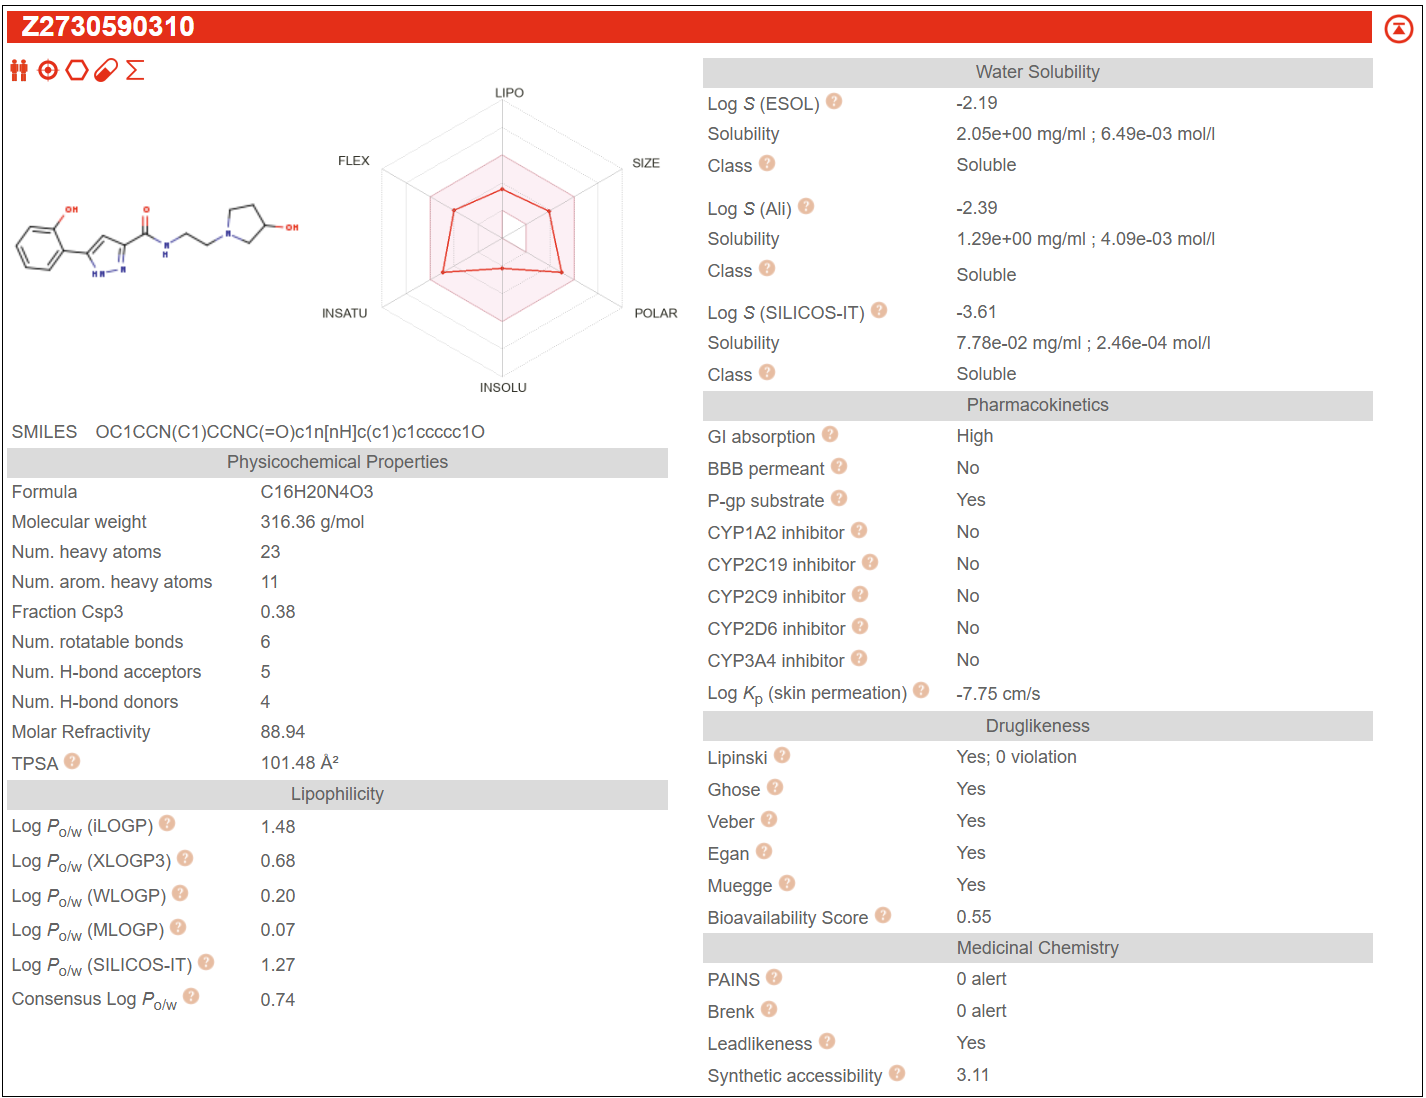

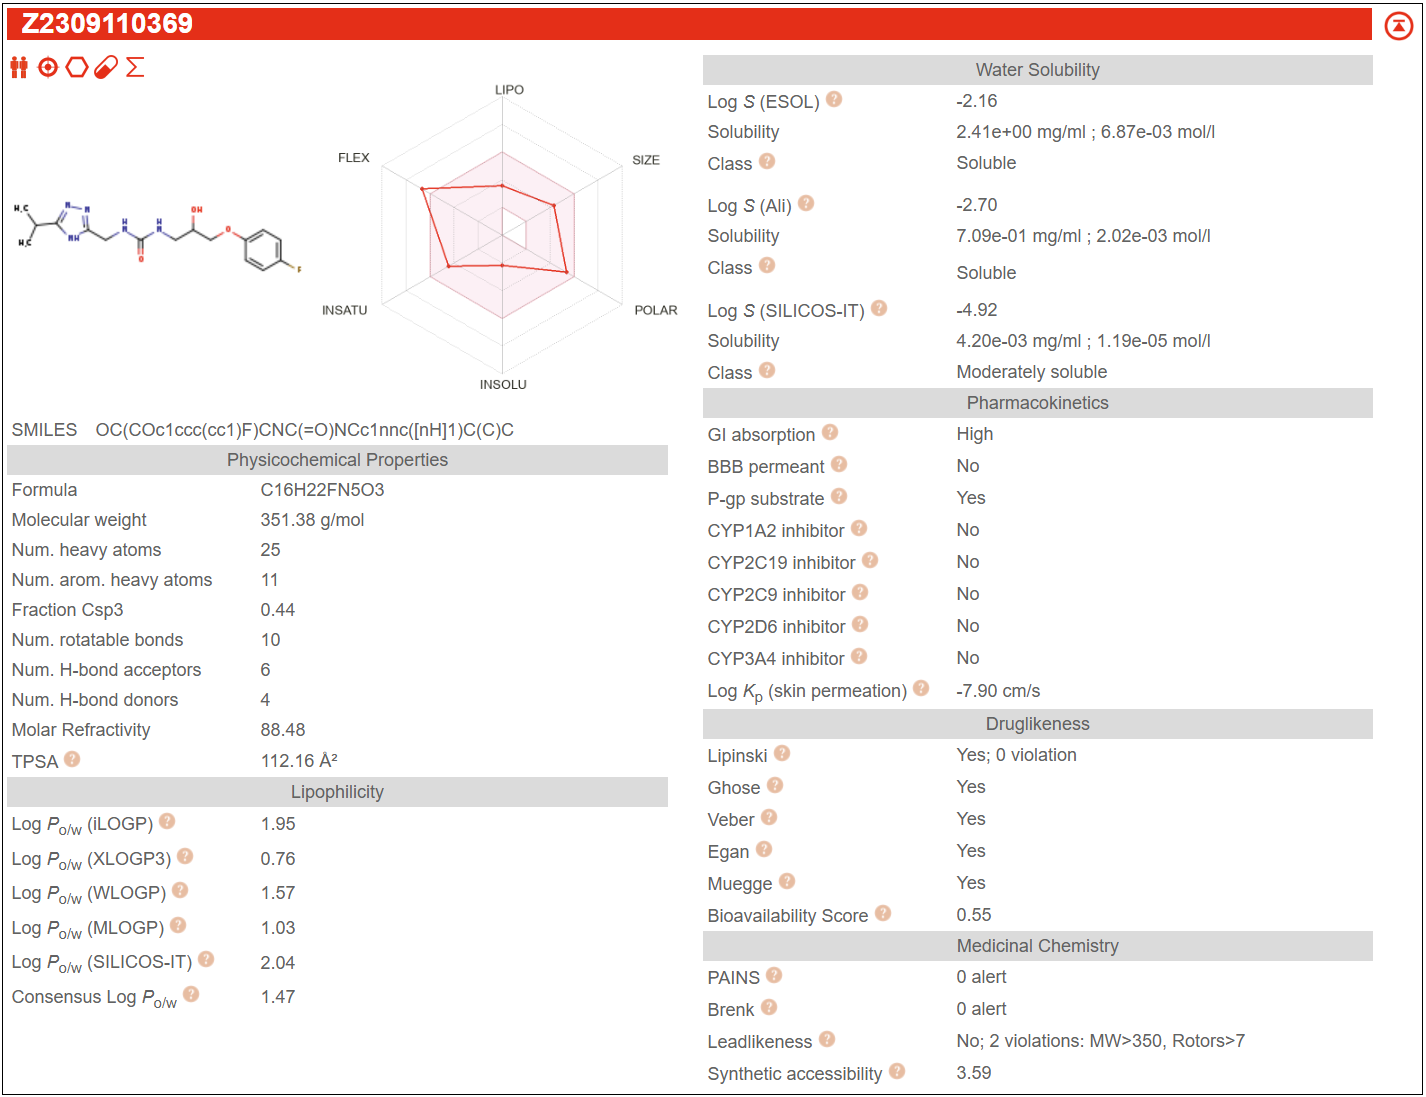


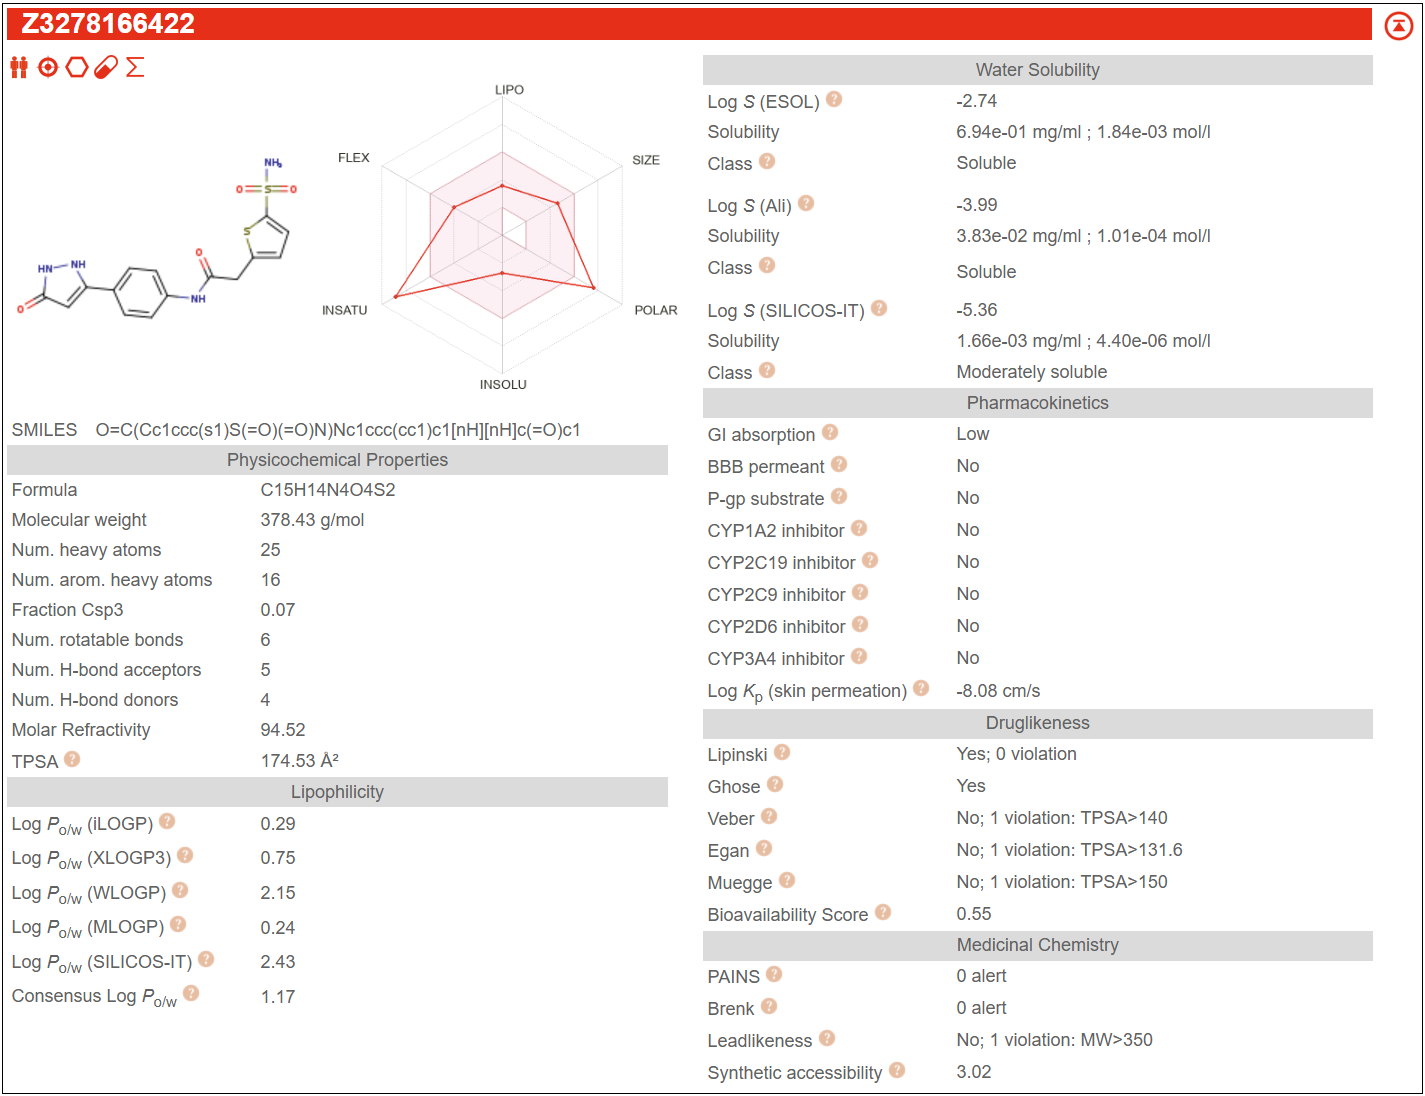

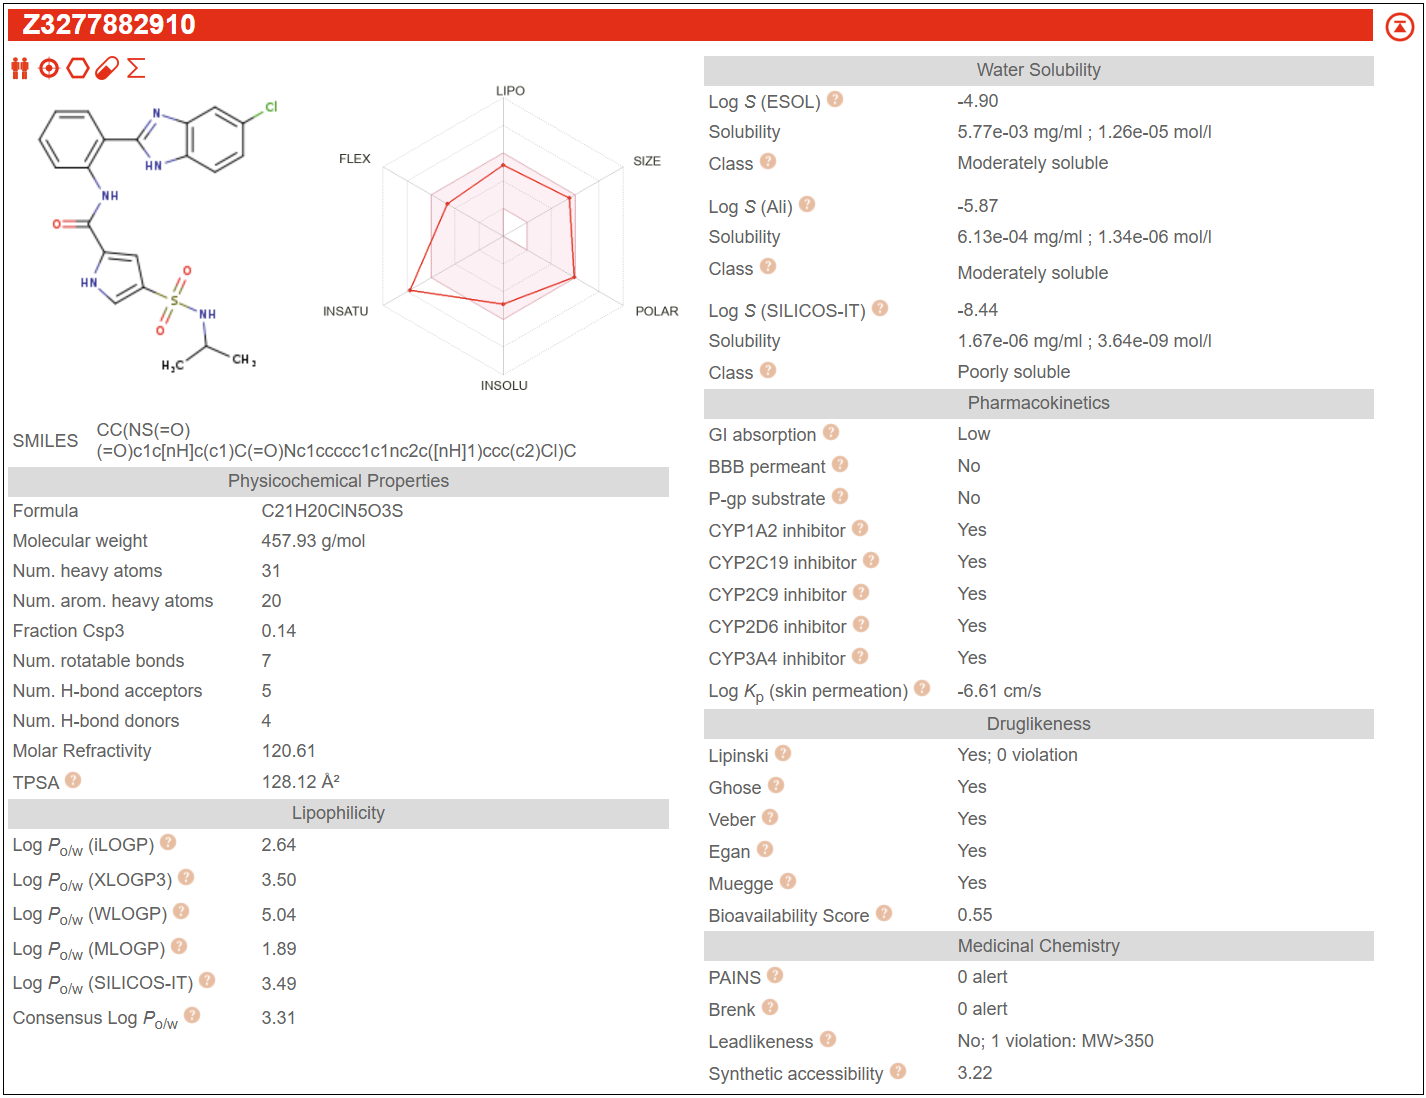


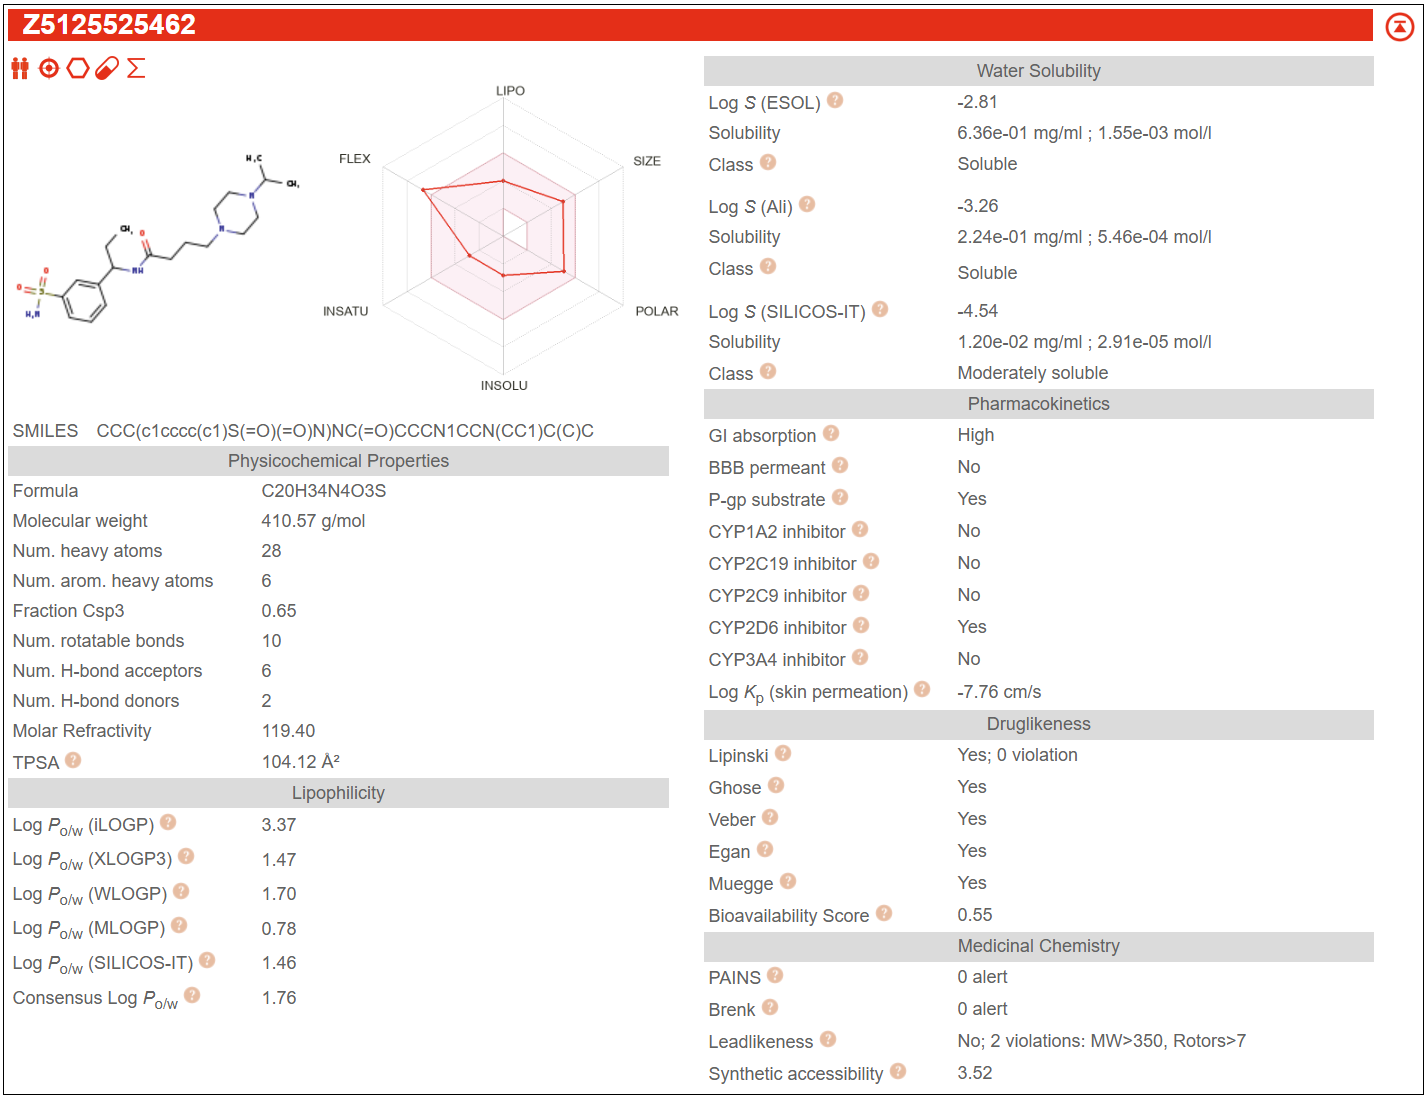

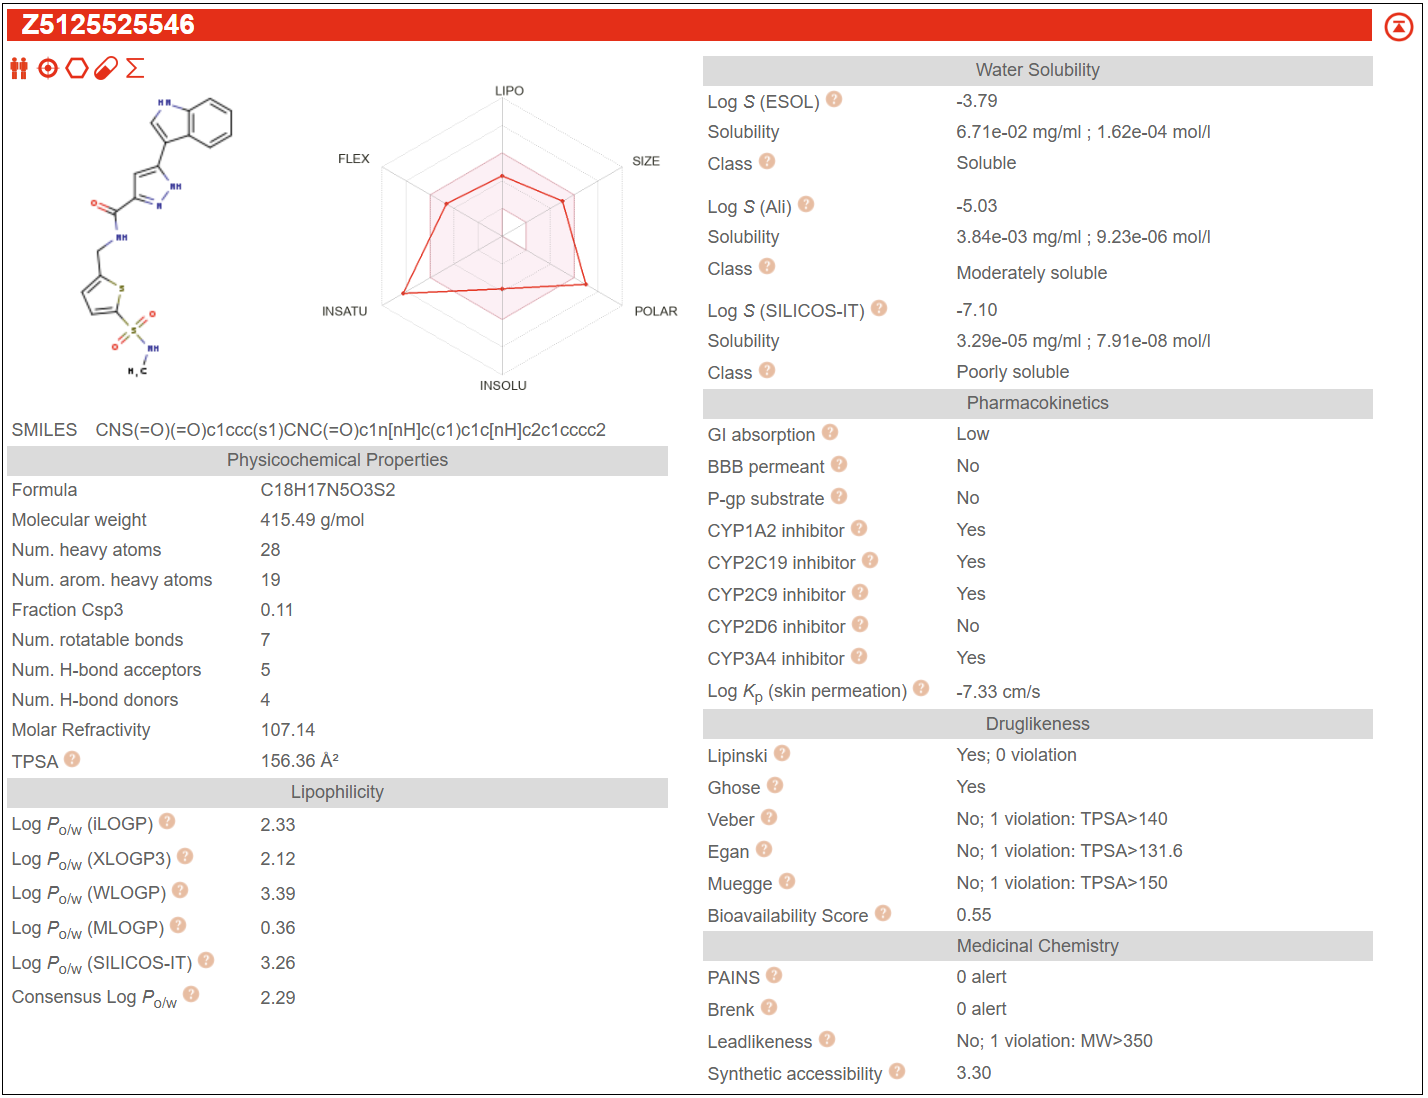


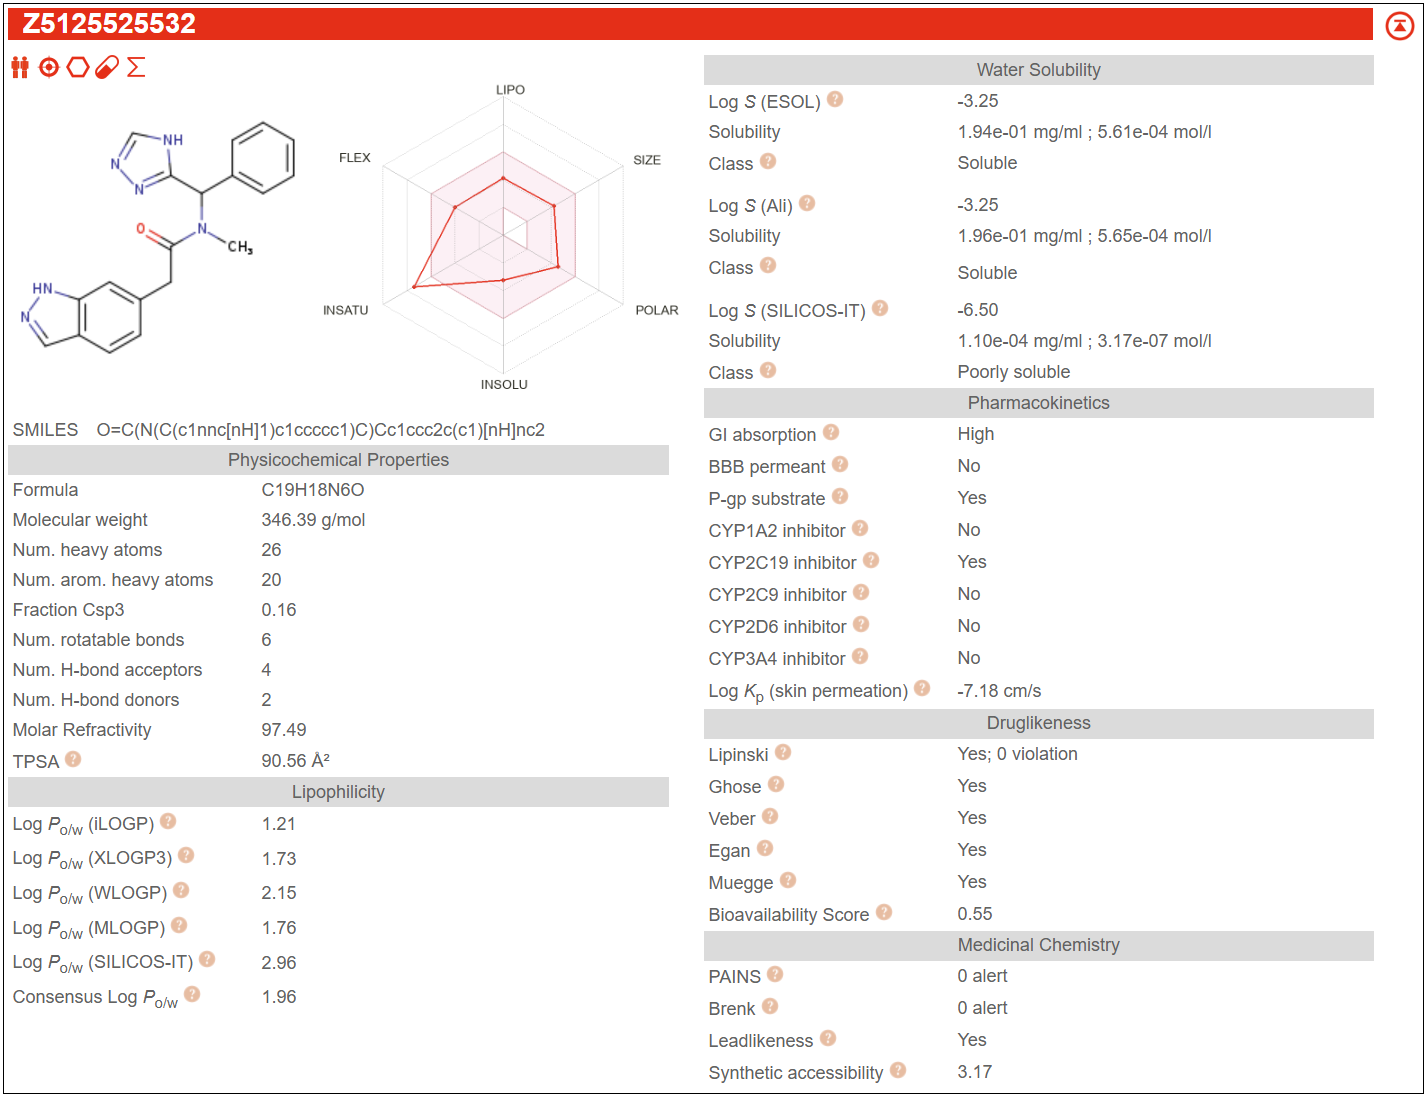

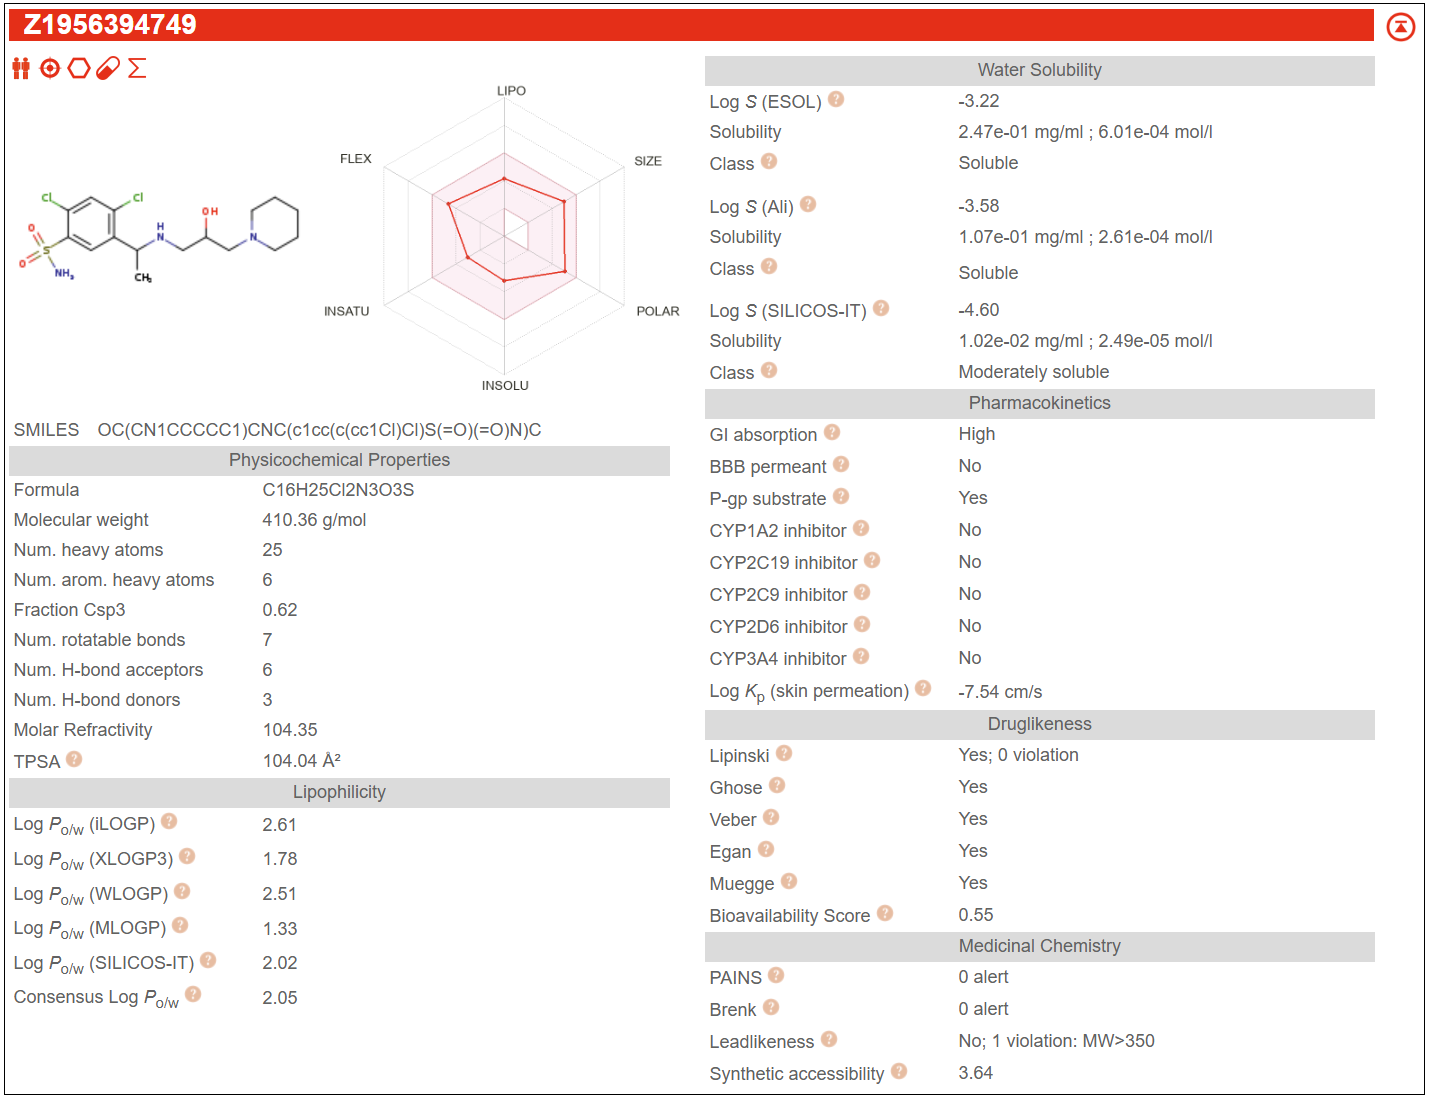


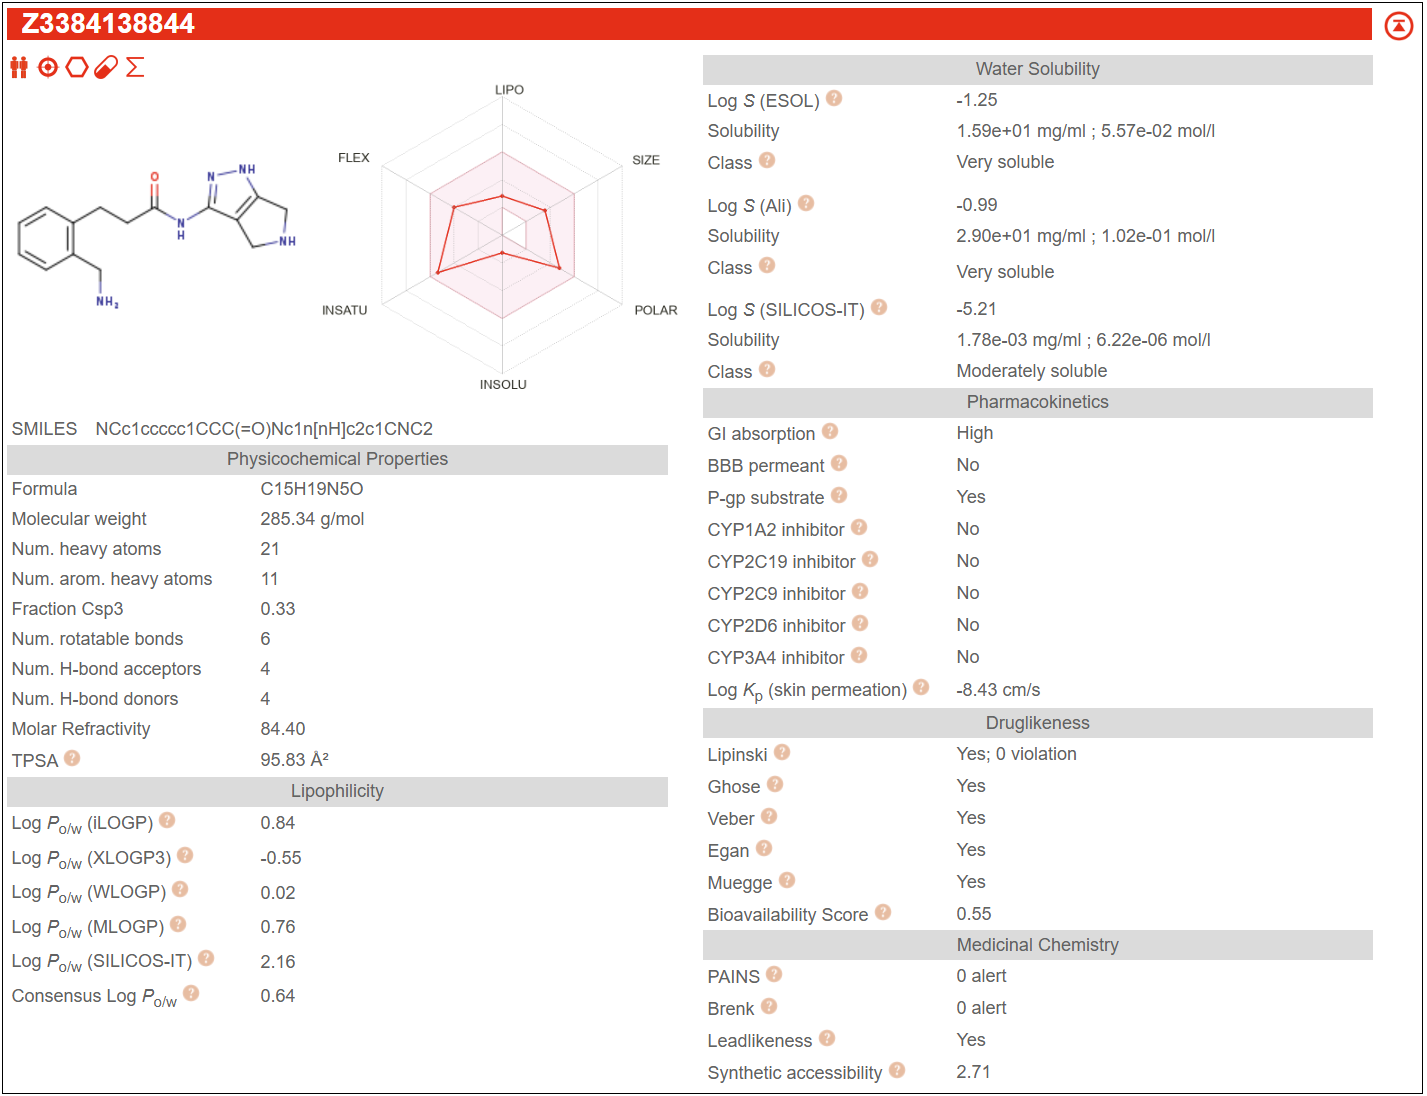

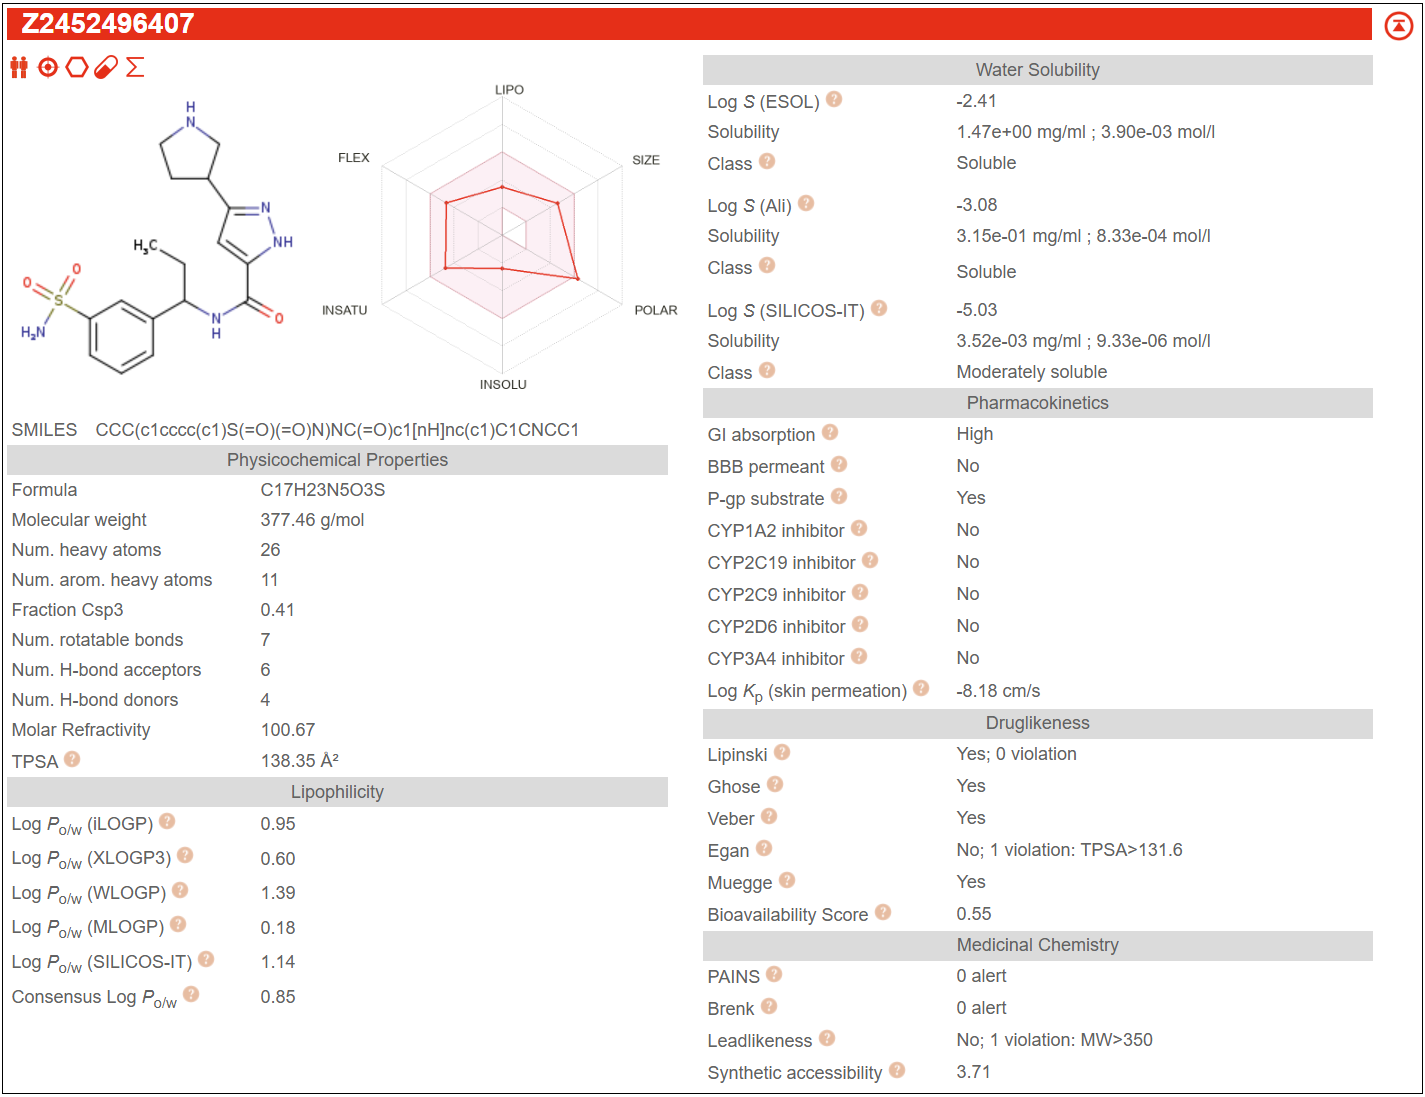


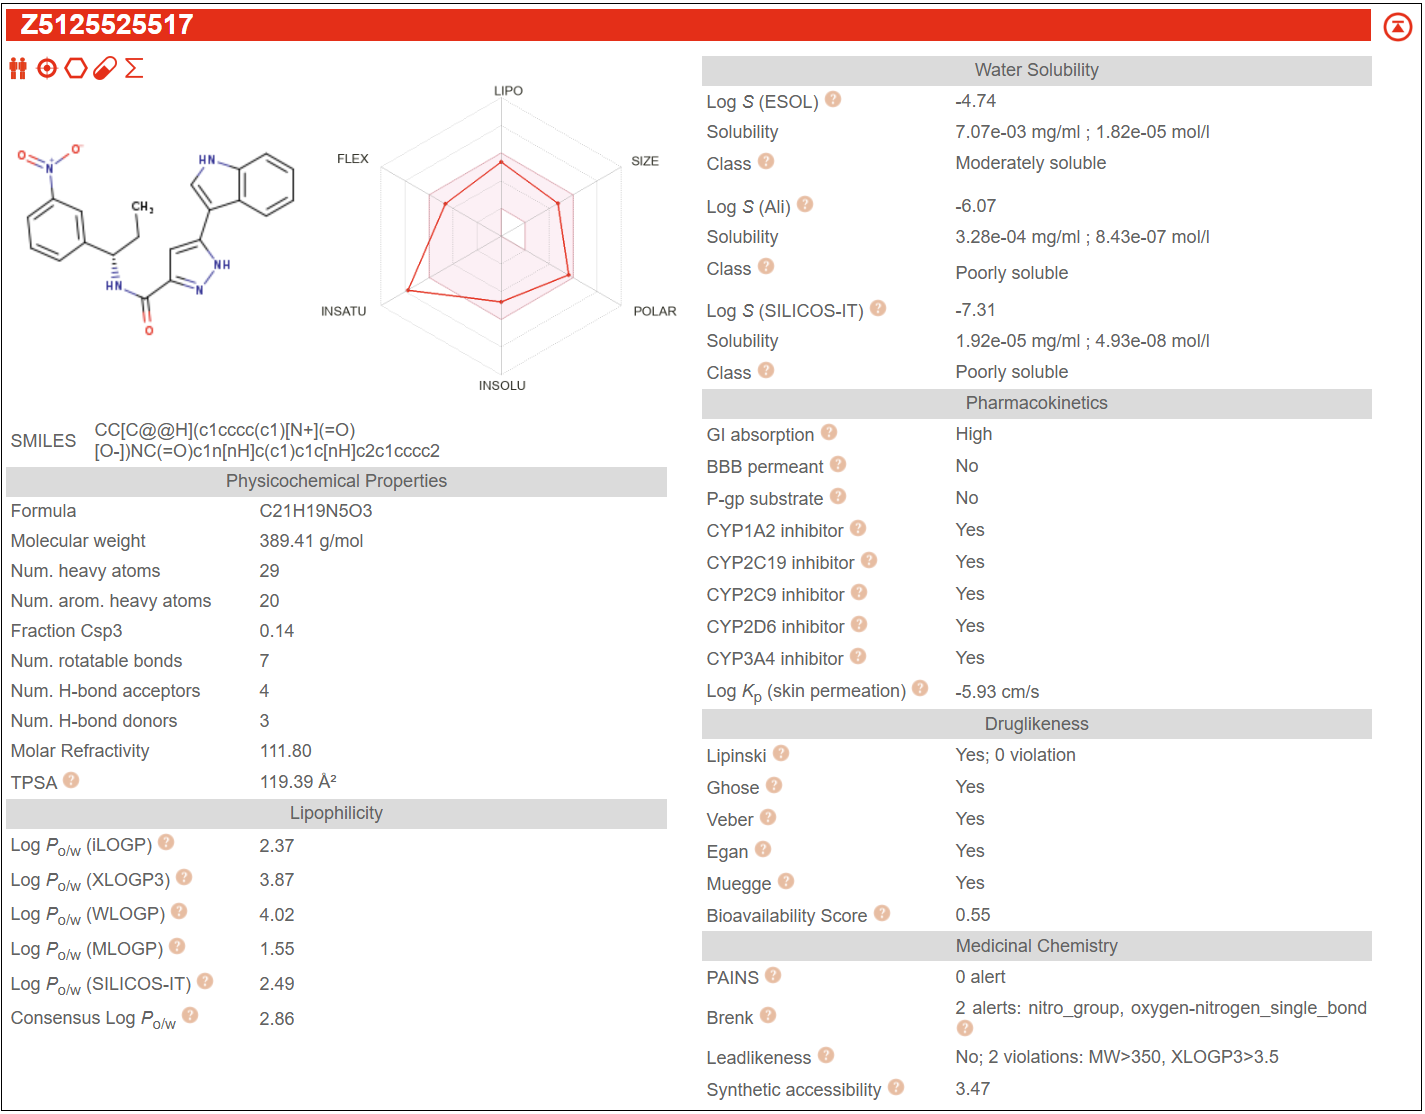

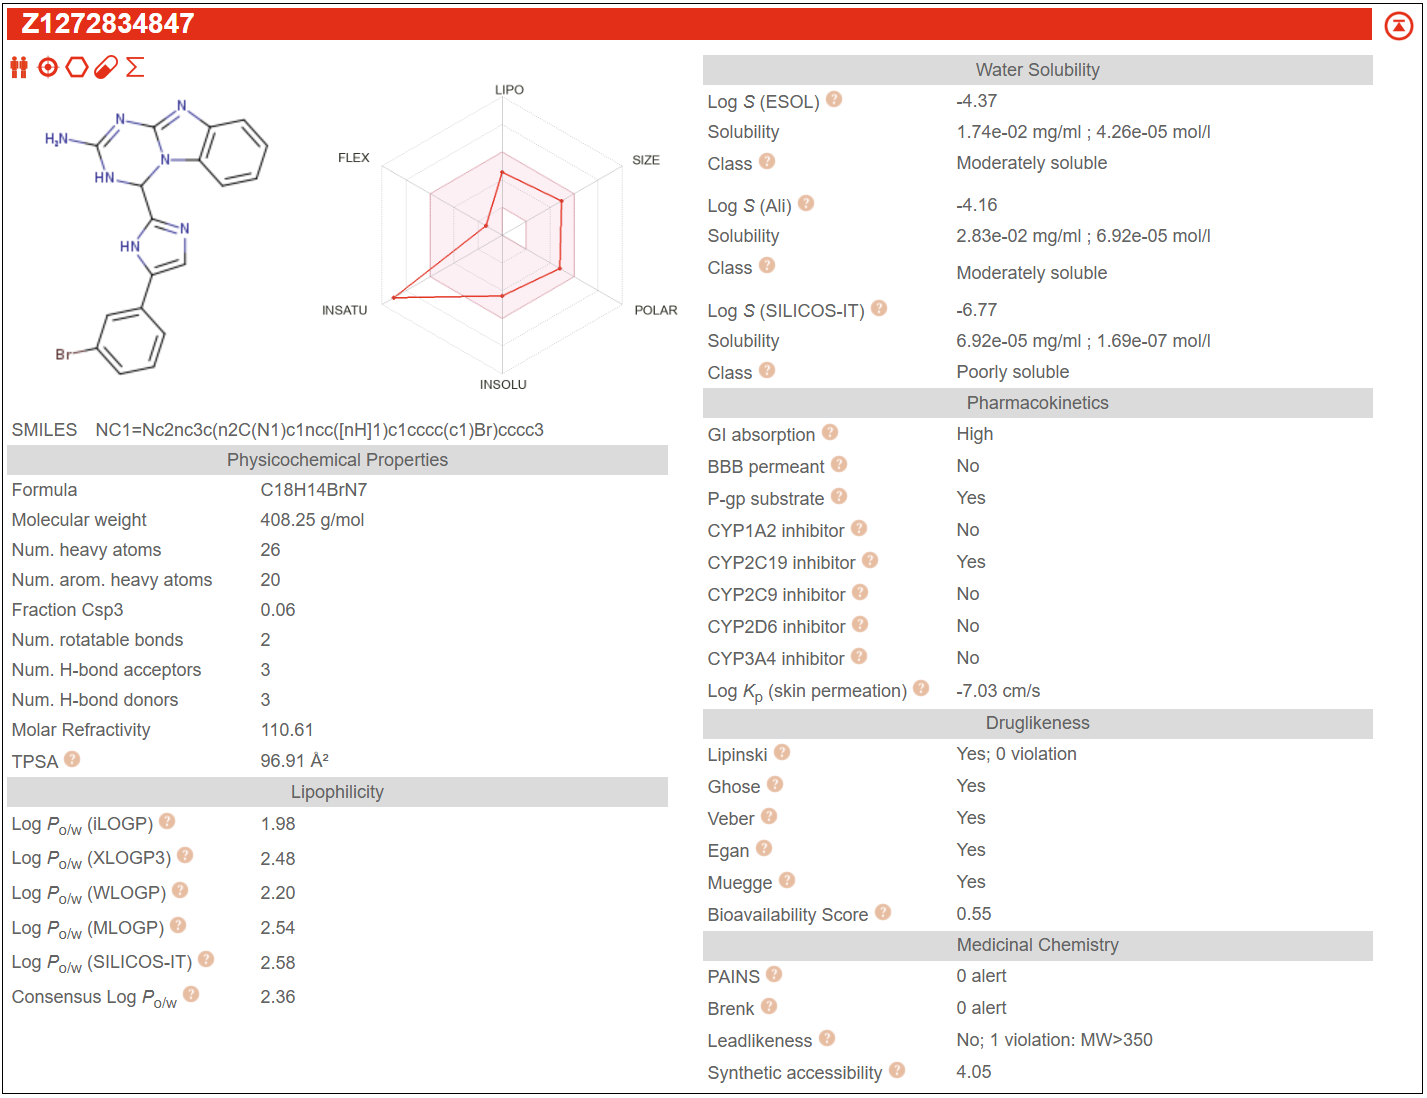


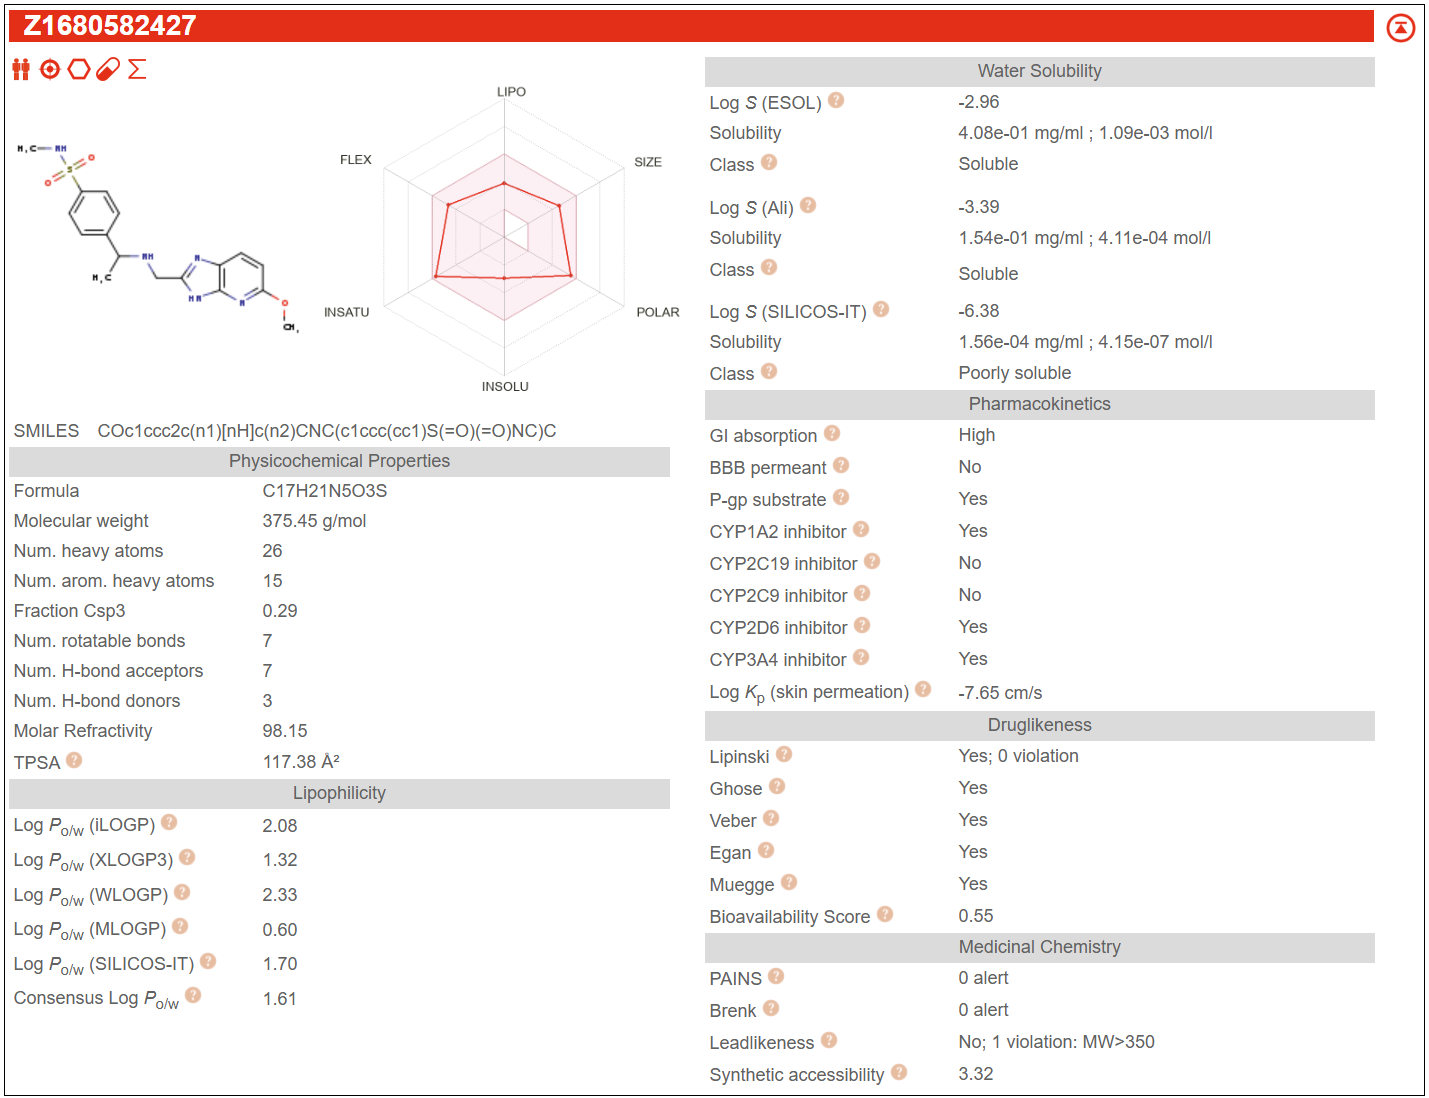

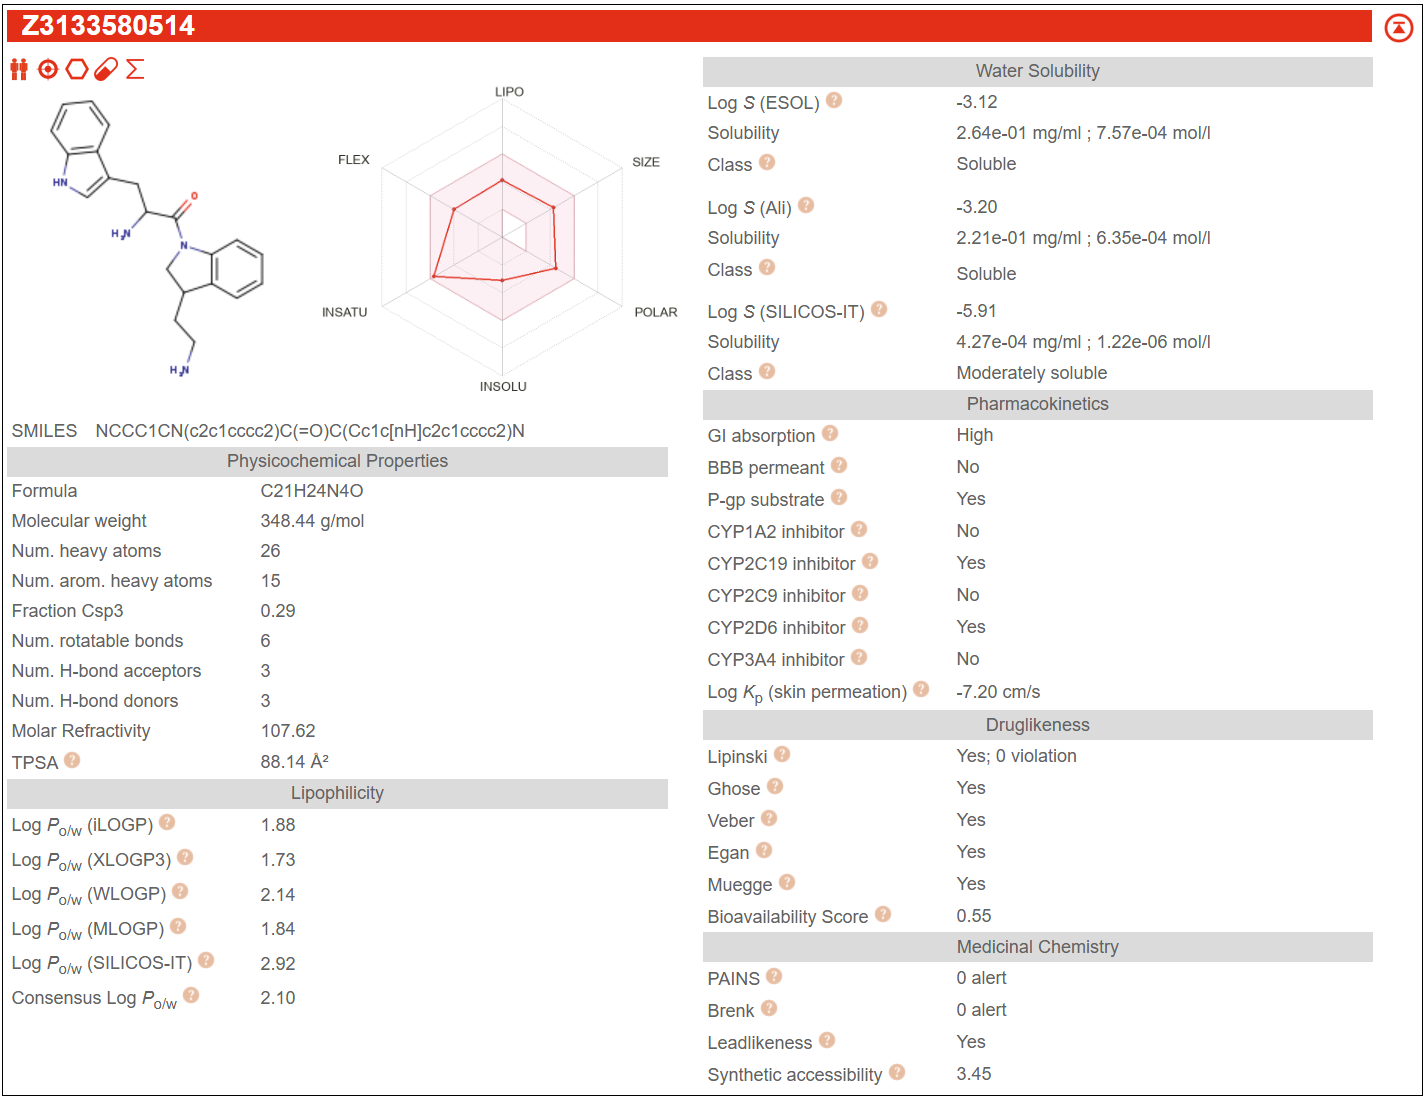


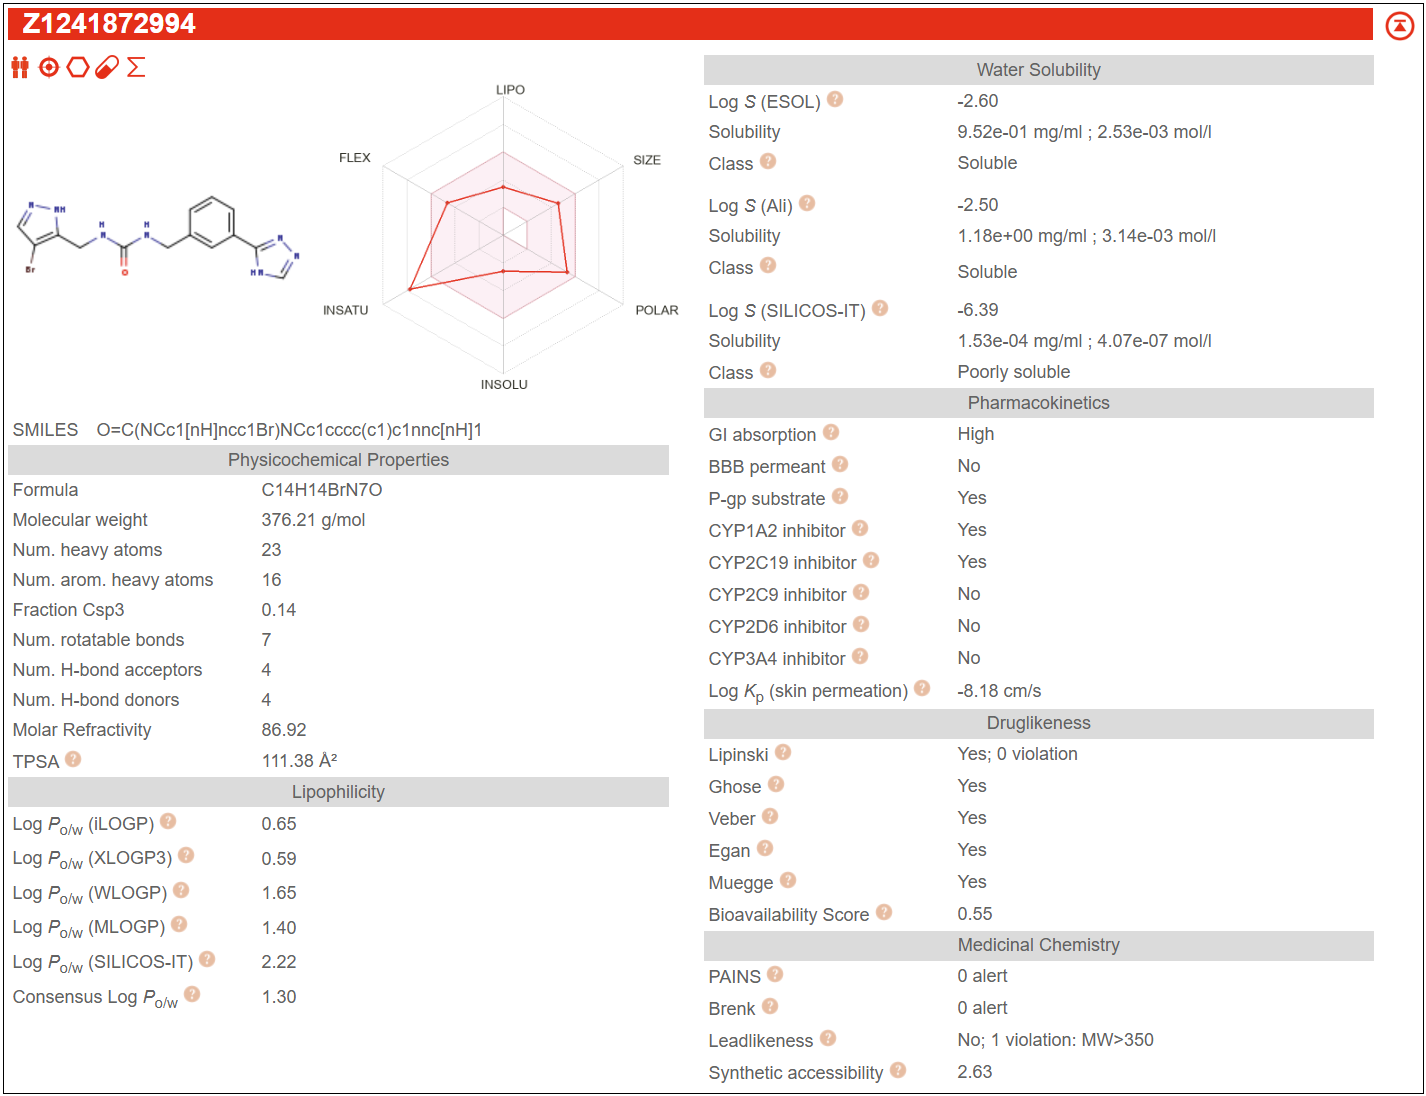


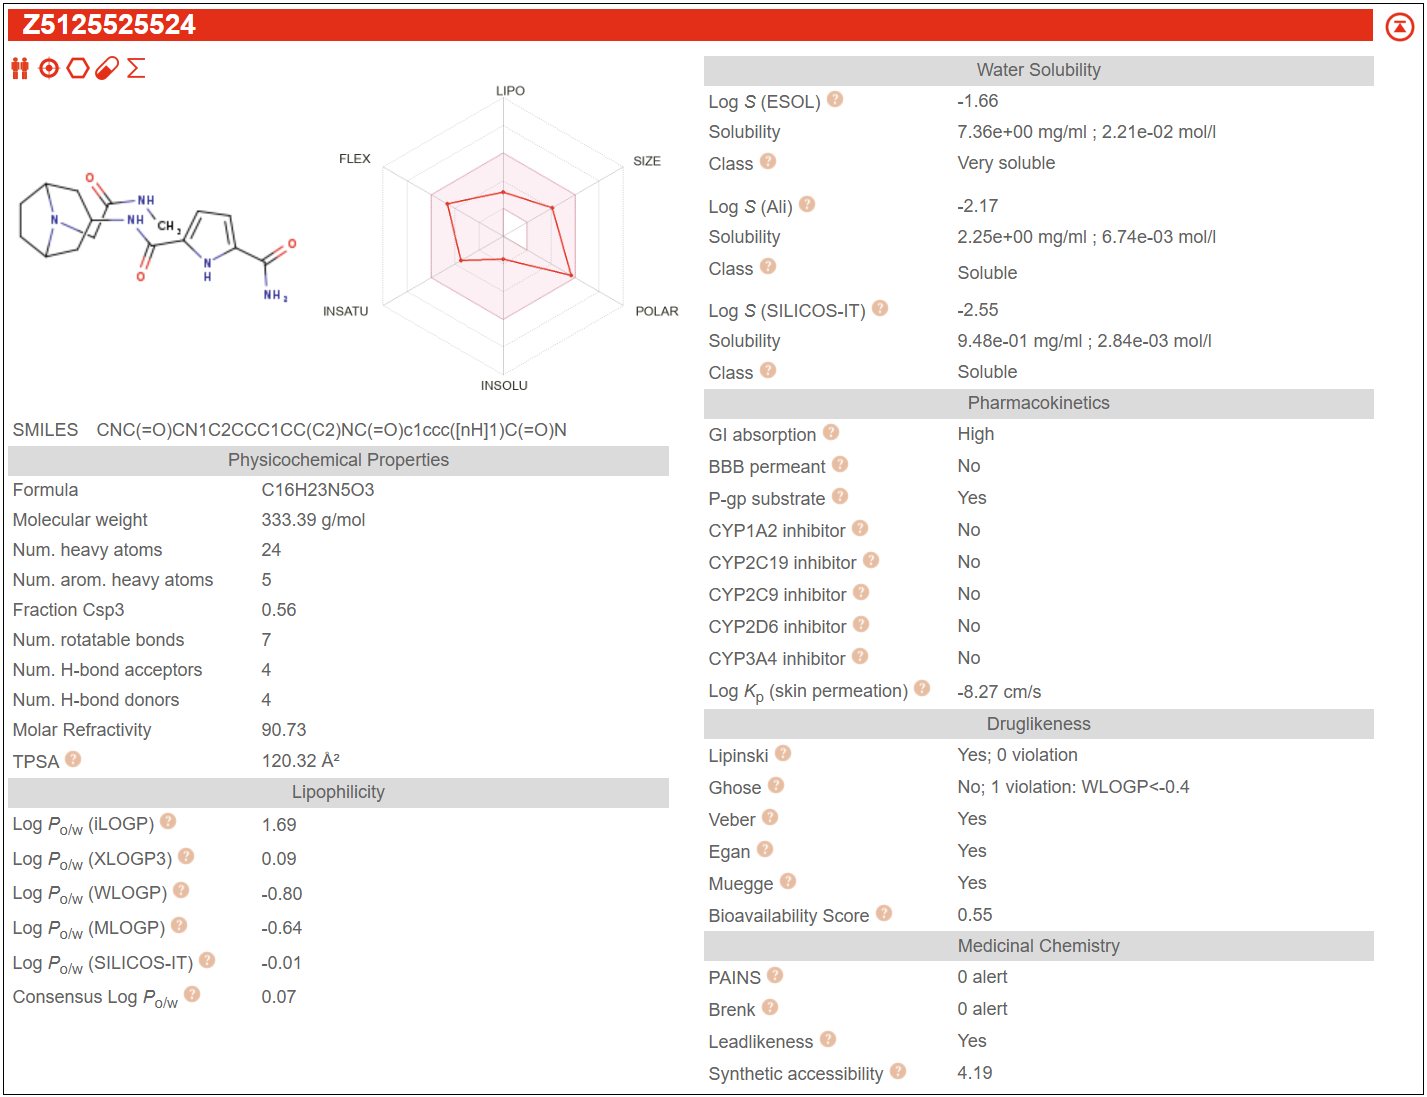

Supplement: Supplemental_Chart_S2.docx [file Supplemental_Chart_S2.docx]
