# Supplementary material
Source: HighWire-hosted journal article supplement (doi:10.1101/rna.080644.125)
Supplement: Supplemental_Chart_S1.docx [file Supplemental_Chart_S1.docx]

**Chart S1.** Filtering rules applied at the Enamine Diversity Set (boldface), showing also those that were not applied as commented out (#).

#/**********************************************************************

#Copyright (C) 2000-2005, 2010 by OpenEye Scientific Software, Inc.

#***********************************************************************/

#This file defines the rules for filtering multi-structure files based on

#properties and substructure patterns.

**MIN_MOLWT 169 "Minimum molecular weight"**

**MAX_MOLWT 506 "Maximum molecular weight"**

#MIN_NUM_HVY 10 "Minimum number of heavy atoms"

#MAX_NUM_HVY 25 "Maximum number of heavy atoms"

**MIN_RING_SYS 1 "Minumum number of ring systems"**

**MAX_RING_SYS 6 "Maximum number of ring systems"**

#MIN_RING_SIZE 0 "Minimum atoms in any ring system"

#MAX_RING_SIZE 20 "Maximum atoms in any ring system"

#MIN_CON_NON_RING 0 "Minimum number of connected non-ring atoms"

#MAX_CON_NON_RING 15 "Maximum number of connected non-ring atoms"

#MIN_FCNGRP 0 "Minimum number of functional groups"

#MAX_FCNGRP 12 "Maximum number of functional groups"

#MIN_UNBRANCHED 0 "Minimum number of connected unbranched non-ring atoms"

#MAX_UNBRANCHED 3 "Maximum number of connected unbranched non-ring atoms"

#MIN_CARBONS 5 "Minimum number of carbons"

#MAX_CARBONS 23 "Maximum number of carbons"

#MIN_HETEROATOMS 2 "Minimum number of heteroatoms"

#MAX_HETEROATOMS 12 "Maximum number of heteroatoms"

#MIN_Het_C_Ratio 0.10 "Minimum heteroatom to carbon ratio"

#MAX_Het_C_Ratio 1.1 "Maximum heteroatom to carbon ratio"

#MIN_HALIDE_FRACTION 0.0 "Minimum Halide Fraction"

#MAX_HALIDE_FRACTION 0.5 "Maximum Halide Fraction"

#count ring degrees of freedom = (#BondsInRing) - 4 - (RigidBondsInRing) - (BondsSharedWithOtherRings) #must be >= 0, from JCAMD 14:251-265,2000.

**ADJUST_ROT_FOR_RING true "BOOLEAN for whether to estimate degrees of freedom in rings"**

**MIN_ROT_BONDS 0 "Minimum number of rotatable bonds"**

**MAX_ROT_BONDS 11 "Maximum number of rotatable bonds"**

#MIN_RIGID_BONDS 0 "Minimum number of rigid bonds"

#MAX_RIGID_BONDS 25 "Maximum number of rigid bonds"

#MIN_HBOND_DONORS 1 "Minimum number of hydrogen-bond donors"

#MAX_HBOND_DONORS 4 "Maximum number of hydrogen-bond donors"

#MIN_HBOND_ACCEPTORS 1 "Minimum number of hydrogen-bond acceptors"

#MAX_HBOND_ACCEPTORS 7 "Maximum number of hydrogen-bond acceptors"

**MIN_LIPINSKI_DONORS 0 "Minimum number of hydrogens on O & N atoms"**

**MAX_LIPINSKI_DONORS 6 "Maximum number of hydrogens on O & N atoms"**

**MIN_LIPINSKI_ACCEPTORS 1 "Minimum number of oxygen & nitrogen atoms"**

**MAX_LIPINSKI_ACCEPTORS 8 "Maximum number of oxygen & nitrogen atoms"**

#MIN_COUNT_FORMAL_CRG 0 "Minimum number formal charges"

#MAX_COUNT_FORMAL_CRG 3 "Maximum number of formal charges"

**MIN_SUM_FORMAL_CRG -1 "Minimum sum of formal charges"**

**MAX_SUM_FORMAL_CRG 3 "Maximum sum of formal charges"**

**MIN_CHIRAL_CENTERS 0 "Minimum chiral centers"**

**MAX_CHIRAL_CENTERS 2 "Maximum chiral centers"**

**MIN_XLOGP -3.4 "Minimum XLogP"**

**MAX_XLOGP 5.4 "Maximum XLogP"**

#choices are insoluble<poorly<moderately<soluble<very<highly

#MIN_SOLUBILITY moderately "Minimum solubility"

**PSA_USE_SandP false "Count S and P as polar atoms"**

**MIN_2D_PSA 14.0 "Minimum 2-Dimensional (SMILES) Polar Surface Area"**

**MAX_2D_PSA 147.0 "Maximum 2-Dimensional (SMILES) Polar Surface Area"**

AGGREGATORS true "Eliminate known aggregators"

#PRED_AGG true "Eliminate predicted aggregators"

#secondary filters (based on multiple primary filters)

#GSK_VEBER true "PSA>140 or >10 rot bonds"

#MAX_LIPINSKI 1 "Maximum number of Lipinski violations"

#MIN_ABS 0.5 "Minimum probability F>10% in rats"

#PHARMACOPIA true "LogP > 5.88 or PSA > 131.6"

**ALLOWED_ELEMENTS H,C,N,O,F,S,Cl,Br**

**ELIMINATE_METALS Sc,Ti,V,Cr,Mn,Fe,Co,Ni,Cu,Zn,Y,Zr,Nb,Mo,Tc,Ru,Rh,Pd,Ag,Cd**

# number of N and O atoms

**NEWRULE MAX_OXYGENS 5 [#8]**

**SELECT NUM_NITROGENS 1 7 [#7]**

#acceptable molecules must have <= instances of each of the patterns below

#specific, undesirable functional groups

RULE 0 quinone

RULE 0 pentafluorophenyl_esters

RULE 0 paranitrophenyl_esters

RULE 0 HOBT_esters

RULE 0 triflates

RULE 0 lawesson_s_reagent

RULE 0 phosphoramides

RULE 0 beta_carbonyl_quat_nitrogen

RULE 0 acylhydrazide

RULE 0 cation_C_Cl_I_P_or_S

RULE 0 phosphoryl

RULE 0 alkyl_phosphate

RULE 0 phosphinic_acid

RULE 0 phosphanes

RULE 0 phosphoranes

RULE 0 imidoyl_chlorides

RULE 0 nitroso

RULE 0 N_P_S_Halides

RULE 0 carbodiimide

RULE 0 isonitrile

RULE 0 triacyloxime

RULE 0 cyanohydrins

RULE 0 acyl_cyanides

RULE 0 sulfonylnitrile

RULE 0 phosphonylnitrile

RULE 0 azocyanamides

RULE 0 beta_azo_carbonyl

RULE 0 polyenes

RULE 0 saponin_derivatives

RULE 1 cytochalasin_derivatives

RULE 4 cycloheximide_derivatives

RULE 1 monensin_derivatives

RULE 1 squalestatin_derivatives

#functional groups which often eliminate compounds from consideration

RULE 0 acid_halide

RULE 0 aldehyde

RULE 0 alkyl_halide

RULE 0 anhydride

RULE 0 azide

RULE 0 azo

RULE 0 di_peptide

RULE 0 michael_acceptor

RULE 0 beta_halo_carbonyl

RULE 0 nitro

RULE 0 oxygen_cation

RULE 0 peroxide

RULE 0 phosphonic_acid

RULE 0 phosphonic_ester

RULE 0 phosphoric_acid

RULE 0 phosphoric_ester

RULE 0 sulfonic_acid

RULE 0 sulfonic_ester

RULE 0 tricarbo_phosphene

RULE 0 epoxide

RULE 0 sulfonyl_halide

RULE 0 halopyrimidine

RULE 0 perhalo_ketone

RULE 0 aziridine

RULE 1 oxalyl

RULE 0 alphahalo_amine

RULE 0 halo_amine

RULE 0 halo_alkene

RULE 0 acyclic_NCN

RULE 0 acyclic_NS

RULE 0 SCN2

RULE 0 terminal_vinyl

RULE 0 hetero_hetero

RULE 0 hydrazine

RULE 0 N_methoyl

RULE 0 NS_beta_halothyl

RULE 0 propiolactones

RULE 0 iodoso

RULE 0 iodoxy

RULE 0 noxide

#groups of molecules

RULE 0 dye

#functional groups which are allowed, but may not be wanted in high quantities

#common functional groups

RULE 6 alcohol

RULE 4 alkene

RULE 4 amide

RULE 4 amino_acid

RULE 2 amine

RULE 4 primary_amine

RULE 4 secondary_amine

RULE 4 tertiary_amine

RULE 2 carboxylic_acid

RULE 6 halide

RULE 0 iodine

RULE 2 ketone

RULE 4 phenol

RULE 1 imine

RULE 1 methyl_ketone

RULE 1 alkylaniline

RULE 4 sulfonamide

RULE 1 sulfonylurea

RULE 0 phosphonamide

RULE 0 alphahalo_ketone

RULE 0 oxaziridine

RULE 1 cyclopropyl

RULE 2 guanidine

RULE 0 sulfonimine

RULE 0 sulfinimine

RULE 1 hydroxamic_acid

RULE 0 sulfinylthio

RULE 0 disulfide

RULE 0 enol_ether

RULE 0 enamine

RULE 0 organometallic

RULE 0 dithioacetal

RULE 1 oxime

RULE 0 isothiocyanate

RULE 0 isocyanate

RULE 3 lactone

RULE 3 lactam

RULE 1 thioester

RULE 1 carbonate

RULE 0 carbamic_acid

RULE 1 thiocarbamate

RULE 0 triazine

RULE 1 malonic

#other functional groups

RULE 2 alkyne

RULE 4 aniline

RULE 4 aryl_halide

RULE 2 carbamate

RULE 3 ester

RULE 5 ether

RULE 1 hydrazone

RULE 0 nonacylhydrazone

RULE 1 hydroxylamine

RULE 2 nitrile

RULE 2 sulfide

RULE 2 sulfone

RULE 2 sulfoxide

RULE 1 thiourea

RULE 1 thioamide

RULE 1 thiol

RULE 2 urea

RULE 0 hemiketal

RULE 0 hemiacetal

RULE 0 ketal

RULE 1 acetal

RULE 0 aminal

RULE 0 hemiaminal

#protecting groups

RULE 0 benzyloxycarbonyl_CBZ

RULE 0 t_butoxycarbonyl_tBOC

RULE 0 fluorenylmethoxycarbonyl_Fmoc

RULE 1 dioxolane_5MR

RULE 1 dioxane_6MR

RULE 1 tetrahydropyran_THP

RULE 1 methoxyethoxymethyl_MEM

RULE 2 benzyl_ether

RULE 2 t_butyl_ether

RULE 0 trimethylsilyl_TMS

RULE 0 t_butyldimethylsilyl_TBDMS

RULE 0 triisopropylsilyl_TIPS

RULE 0 t_butyldiphenylsilyl_TBDPS

RULE 1 phthalimides_PHT

RULE 2 arenes

*********** Progress Update ***********

Number of Molecules Processed = 25802378

Number of Molecules Passed = 15978928

Number of Molecules Filtered = 9823450

****************************************
