# Supplementary material
Source: HighWire-hosted journal article supplement (doi:10.1101/rna.080644.125)
Supplement: Supplemental_Fig_S1.docx [file Supplemental_Fig_S1.docx]

**Supplementary Figure S1.** Chemical structures of the 26 compounds tested as shown in Table 1.
