# Supplementary material
Source: HighWire-hosted journal article supplement (doi:10.1101/rna.080644.125)
Supplement: Supplemental_Fig_S2.docx [file Supplemental_Fig_S2.docx]

**Supplementary Figure S2.** Optical density-concentration graph of S. aureus RN4220 growth in the presence of serial dilutions of T-box-i in nutrient-rich medium (blue) or minimal medium (grey). Also, a representation of the growth in non-inhibiting compounds (MIC>512 μg/ml) is shown (red).
