# Supplementary material
Source: HighWire-hosted journal article supplement (doi:10.1101/rna.080644.125)
Supplement: Supplemental_Fig_S4.docx [file Supplemental_Fig_S4.docx]

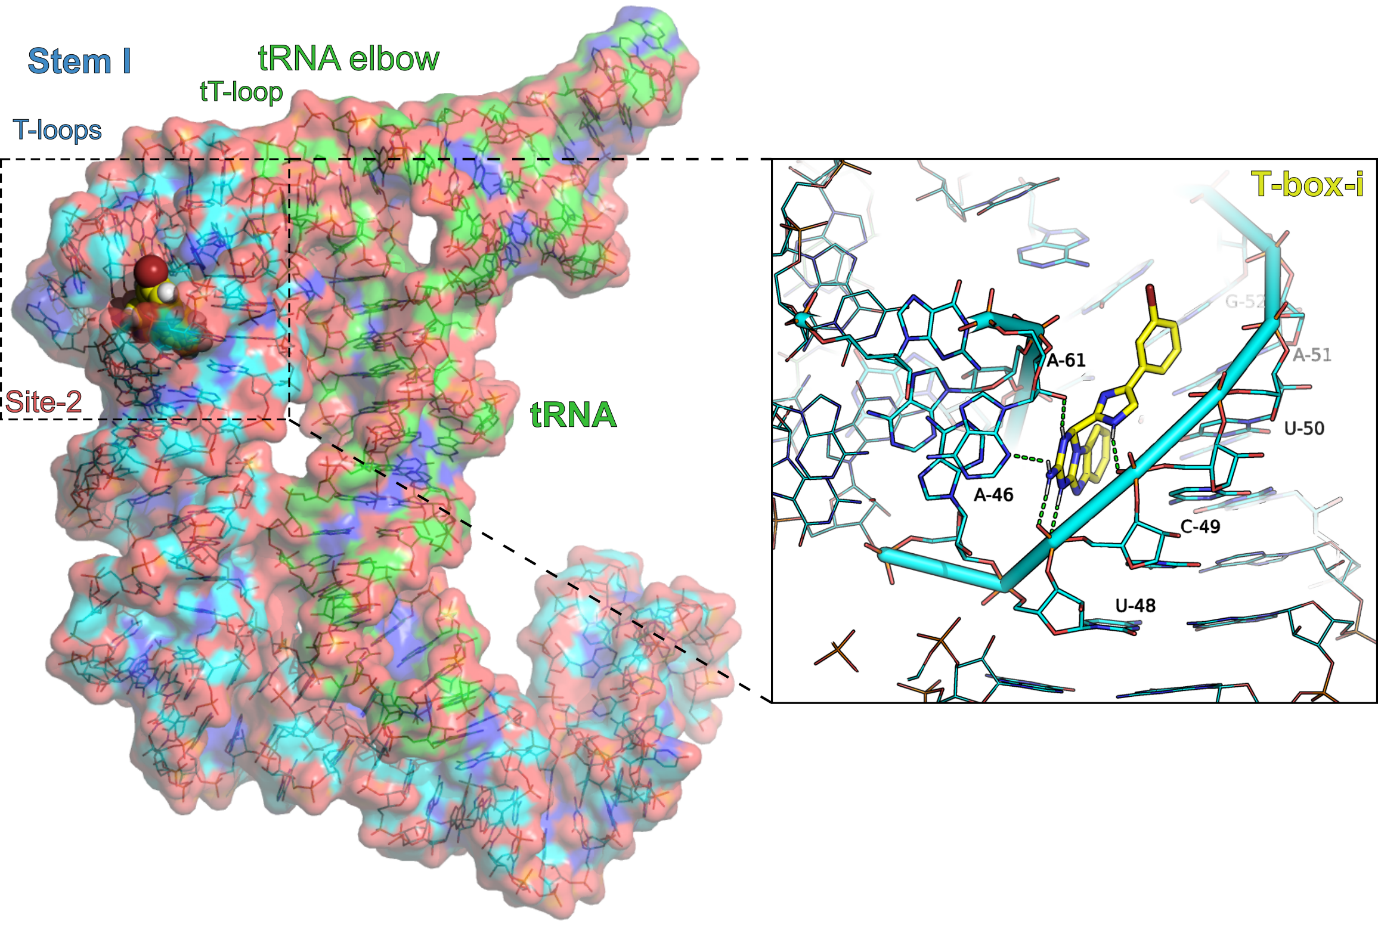


**Supplementary Figure S4.** Molecular model of the T-box bound inhibitor, **T-box-i** (Z1272834847 in Table 1 and Scheme S1) at the targeted site-2 in the Stem I T-loops. Inset the docked conformation of **T-box-i** illustrating putative hydrogen bonding interactions with A-61 and the phosphate backbone of U-48 and C-49 (green dashed lines).
