# Supplementary material
Source: HighWire-hosted journal article supplement (doi:10.1101/rna.080644.125)
Supplement: Supplemental_Fig_S5.docx [file Supplemental_Fig_S5.docx]

**Supplementary Figure S5.** Docked poses of 5 compounds that were selected from virtual screening at the targeted site-2 (Stem I apical loop). Compounds are labelled with their compound number_ID as given in Table 1, whereas atom colors are as in Figure S4.
