# Supplementary material
Source: HighWire-hosted journal article supplement (doi:10.1101/rna.080644.125)
Supplement: Supplemental_Fig_S6.docx [file Supplemental_Fig_S6.docx]

**Supplementary Figure S6.** The docked poses of the initial set of 12 compounds that were selected from virtual screening at the targeted site-1 (Stem I specifier loop). Compounds are labelled with their compound number_ID as given in Table 1, whereas atom colors are as in Figure S4.
