# Supplementary material
Source: HighWire-hosted journal article supplement (doi:10.1101/rna.080644.125)
Supplement: Supplemental_Fig_S7.docx [file Supplemental_Fig_S7.docx]

**
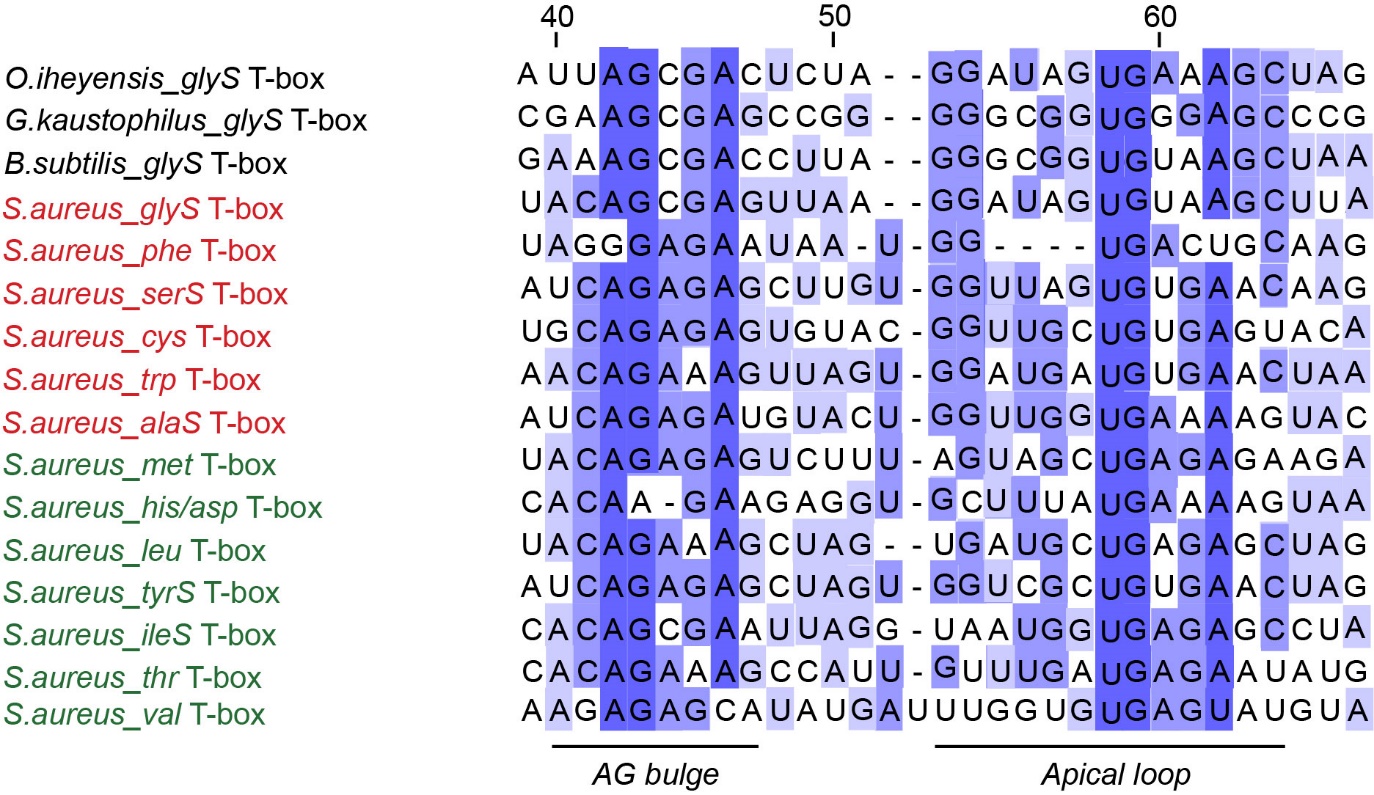
**

**Supplementary Figure S7.** Sequence alignment of the AG bulge and apical loop regions of *S. aureus* T-box riboswitches. T-boxes affected by T-box-I are marked in red, while those that are unaffected are marked in green. The alignment also includes the *glyS* T-boxes from *O. iheyensis*, *G. kaustophilus* and *B. subtilis*. For the alignment, highly conserved nucleotides (80–100%) are indicated in dark blue, moderately conserved nucleotides (50–80%) are indicated in blue, and less conserved nucleotides (≤50%) are indicated in light blue. Alignment numbering corresponds to the numbering of *O. iheyensis glyS* T-box.
